# Supplementary material for: Small Molecule Screening with Laser Cytometry Can Be Used to Identify Pro-Survival Molecules in Human Embryonic Stem Cells
Source: PLoS One. 2013 Jan 29;8(1):e54948. doi: 10.1371/journal.pone.0054948 (PMC3558484; doi:10.1371/journal.pone.0054948)
Supplement: Table S2 — Normalized Z scores for propidium iodide based hESC survival screen. (XLS) [file pone.0054948.s002.xls]

## Sheet: PI screen
Supplementary Table 2: Normalized z scores for propidium iodide based hESC survival screen.
Molecule Name	Z score
15(S)-HETrE	38.8
PROSTAGLANDIN B2	34.9
5(S),12(R)-DIHETE all trans	32.3
U-46619	31.6
15-KETOEICOSATETRAENOIC ACID	30.9
5(S),15(S)-DIHETE	30.9
PROSTAGLANDIN A1	30.8
5(S)-HETE	28.4
13,14-DIHYDRO-15-KETO-PGF2a	27.2
LEUKOTRIENE B4	25.5
8(S)-HETE	24.6
5(S)-HPETE	22.2
ASN 09646913	8.31
HA-1077	7.46
ASN 02170768	7.27
ASN 06366024	4.86
T5600863	4.59
ASN 05920095	4.48
ASN 04194067	4.45
ASN 05835970	4.37
ASN 07186617	4.29
ASN 05657158	4.23
ASN 05588009	4.18
ASN 03204678	4.17
ASN 06914179	4.11
ASN 02255432	4.1
T5661427	4.03
ASN 05545052	4.02
T5598427	4.01
ANANDAMIDE (20:4, n-6)	3.93, -1.13
ASN 06535342	3.86
ASN 06942960	3.74
T5600913	3.7
T5602829	3.67
ASN 06117688	3.64
ASN 04482534	3.61
ASN 05803907	3.58
ASN 07025231	3.57
T5704042	3.52
T5645093	3.51
ASN 05914809	3.49
ASN 03801390	3.46
ASN 06231442	3.45
T5615790	3.42
ASN 06918170	3.41
T5681449	3.39
13-CIS RETINOIC ACID	3.38
ASN 02539092	3.38
ASN 06567364	3.37
T5601686	3.37
ASN 02323924	3.36
ASN 06866095	3.34
T5597864	3.32
T5668290	3.31
ASN 06292127	3.3
T5654902	3.3
ASN 06564801	3.29
ASN 07101037	3.29
ASN 06866032	3.28
T5592344	3.28
ASN 06744500	3.27
T5681425	3.25
ASN 04370772	3.24
ASN 05919847	3.24
T5661512	3.24
T5688089	3.23
ASN 07806309	3.14
ASN 02538886	3.12
ASN 06920157	3.12
ASN 04049371	3.11
T5684165	3.11
ASN 06978291	3.08
ASN 09378704	3.08
ASN 05588310	3.06
T5661454	3.05
ASN 04373600	3.04
ASN 06403270	3.02
ASN 06411587	3.02
T5679811	3.02
T5707330	3.02
ASN 01280134	3.01
ASN 05932187	3.01
T5642664	3.01
T5707354	3.01
T5639727	3
ASN 06552198	2.98
ASN 06955150	2.97
ASN 07103435	2.97
ASN 05383610	2.96
T5690924	2.96
T5692684	2.95
ASN 05651489	2.94
ASN 06220945	2.94
ASN 04482255	2.93
ASN 04482607	2.91
T5645103	2.91
T5572021	2.9
ASN 06579701	2.89
T5611768	2.89
ASN 05448256	2.87
ASN 05545549	2.87
T5679453	2.87
ASN 05077058	2.86
ASN 06351061	2.86
ASN 06941889	2.86
ASN 07083076	2.86
T5654958	2.86
T5602776	2.85
T5647637	2.85
ASN 07153560	2.84
T5608058	2.84
ASN 05551154	2.83
ASN 06941295	2.83
ASN 08737568	2.83
ASN 03156477	2.82
T5670602	2.82
T5794726	2.82
ASN 05392559	2.81
ASN 05557081	2.81
ASN 06913087	2.81
ASN 09114490	2.81
ASN 06919484	2.8
T5601695	2.8
T5688038	2.8
ASN 05103827	2.79
T5703379	2.79
ASN 03580101	2.77
ASN 04890366	2.77
ASN 05588309	2.77
T5615826	2.77
T5679851	2.77
ASN 05386841	2.76
ASN 06483045	2.76
T5631337	2.76
T5694928	2.76
ASN 01377678	2.75
ASN 04248339	2.75
ASN 05988658	2.75
ASN 06578041	2.75
ASN 06914445	2.75
ASN 08909827	2.75
T5600861	2.75
T5693949	2.75
ASN 04037260	2.74
ASN 06398895	2.74
T5639729	2.74
ASN 03791973	2.73
ASN 02325090	2.72
ASN 03367099	2.72
T5598348	2.72
ASN 04455457	2.71
ASN 06399013	2.71
T5606856	2.71
T5688199	2.71
ASN 04393237	2.7
T5656737	2.7
ASN 05923737	2.69
T5600884	2.69
ASN 04250783	2.68
ASN 08910114	2.68
T5628451	2.68
T5650285	2.68
ASN 03580239	2.67
ASN 06580109	2.67
T5620223	2.67
ASN 03365207	2.66
ASN 05388537	2.66
ASN 05397237	2.66
ASN 06231617	2.66
ASN 06866043	2.66
ASN 08748498	2.66
ASN 09857891	2.66
T5741072	2.66
ASN 08896068	2.65
ASN 04189202	2.64
ASN 04248416	2.64
ASN 05974826	2.64
ASN 06220853	2.63
T5600856	2.62
T5637040	2.61
ASN 03876457	2.6
ASN 06462467	2.6
T5633636	2.6
T5640125	2.6
T5647608	2.6
T5647715	2.6
T5648586	2.6
T5657519	2.6
ASN 05110888	2.59
ASN 05558293	2.59
ASN 05571698	2.59
ASN 05588406	2.59
ASN 06749528	2.59
ASN 06977253	2.59
T5698868	2.59
T5699943	2.59
ASN 05932186	2.58
ASN 06117676	2.58
ASN 06402922	2.58
ASN 07331004	2.58
ASN 06978448	2.57
ASN 06265204	2.56
ASN 06578048	2.56
ASN 06914641	2.56
T5647694	2.56
ASN 06236101	2.55
T5646980	2.55
ASN 05542035	2.54
ASN 06352983	2.54
ASN 07048985	2.54
ASN 08895915	2.54
ASN 04674024	2.53
ASN 06579255	2.53
ASN 06955244	2.53
ASN 04208980	2.52
ASN 05109954	2.52
ASN 05803918	2.52
ASN 08737170	2.52
ASN 09436953	2.52
H-89	2.52
T5571508	2.52
T5655104	2.52
T5693798	2.52
ASN 03207197	2.51
ASN 05019695	2.51
ASN 05111110	2.51
ASN 06117020	2.51
ASN 06118473	2.51
T5610243	2.51
T5630007	2.51
ASN 03776060	2.5
ASN 04046431	2.5
ASN 05558008	2.5
ASN 05937638	2.5
ASN 06535532	2.5
ASN 08831984	2.5
T5636901	2.5
T5681565	2.5
ASN 03580146	2.49
ASN 04392422	2.49
ASN 05299542	2.49
ASN 05987994	2.49
ASN 06118472	2.49
ASN 06399246	2.49
ASN 03801386	2.48
ASN 05644529	2.48
ASN 06396687	2.48
ASN 07110154	2.48
ASN 07112125	2.48
T5588440	2.48
T5633235	2.48
ASN 04037545	2.47
ASN 05668335	2.47
STAUROSPORINE	2.47
T5694401	2.47
ASN 08822274	2.46
ASN 05300516	2.45
T5692427	2.45
ASN 04027467	2.44
ASN 04888795	2.44
ASN 03367640	2.43
ASN 06262779	2.43
ASN 06954102	2.43
ASN 07108634	2.43
ASN 09172168	2.43
ASN 03432761	2.42
ASN 04209508	2.42
ASN 04418572	2.42
ASN 05459293	2.42
ASN 05553840	2.42
ASN 06116979	2.41
ASN 06552196	2.41
ASN 06590589	2.41
ASN 06915061	2.41
T5718280	2.41
ASN 06217805	2.39
ASN 06744530	2.39
ASN 05588038	2.38
ASN 06220814	2.38
ASN 07186383	2.38
T5669069	2.38
T5887803	2.38
ASN 05659291	2.37
ASN 05936520	2.37
ASN 07104485	2.37
ASN 08246501	2.37
ASN 04454881	2.36
ASN 05553883	2.36
T5572016	2.36
T5631456	2.36
T5634557	2.36
T5640335	2.36
T5721307	2.36
T5652737	2.35
ASN 05544114	2.34
ASN 06351496	2.34
ASN 06552063	2.34
ASN 06579632	2.34
T5588594	2.34
T5600660	2.34
T5704041	2.34
ASN 05108552	2.33
ASN 05391214	2.33
ASN 05808032	2.33
ASN 06014840	2.33
ASN 06400667	2.33
T5634357	2.33
ASN 04196318	2.32
ASN 04258166	2.32
ASN 05386786	2.32
T5585508	2.32
T5615838	2.32
T5688045	2.32
ASN 05383096	2.31
ASN 06578647	2.31
ASN 07330919	2.31
ASN 04456335	2.3
ASN 05083309	2.3
ASN 06014813	2.3
ASN 06291632	2.3
T5624102	2.3
ASN 06356056	2.29
ASN 07103701	2.29
ASN 03800865	2.28
ASN 05988333	2.28
ASN 06919141	2.28
ASN 08741991	2.28
T5642733	2.28
T5666688	2.28
ASN 05546259	2.27
ASN 06578333	2.27
ASN 02915176	2.26
ASN 04482648	2.26
ASN 06482107	2.26
T5585939	2.26
ASN 06291574	2.25
ASN 06918938	2.25
ASN 03204051	2.24
ASN 04037268	2.24
ASN 05392560	2.24
ASN 06018167	2.24
ASN 06532601	2.24
ASN 08798853	2.24
ASN 09858030	2.24
T5622622	2.24
T5697536	2.24
T5828383	2.24
ASN 03203745	2.23
ASN 04049822	2.23
ASN 04480843	2.23
ASN 06291043	2.23
ASN 06581554	2.23
ASN 06978284	2.23
PAF C16	2.23
T5617095	2.23
T6013647	2.23
ASN 04360861	2.22
ASN 06540925	2.22
ASN 07277226	2.22
ASN 09583979	2.22
ASN 05299479	2.21
ASN 05812735	2.21
ASN 06351080	2.21
ASN 06534428	2.21
ASN 07438956	2.21
T5618282	2.21
T5721255	2.21
ASN 03365116	2.2
ASN 04889003	2.2
ASN 05588063	2.2
ASN 05588972	2.2
ASN 06224634	2.2
ASN 06752687	2.2
T5571601	2.2
T5616825	2.2
T5627051	2.2
ASN 04023932	2.19
ASN 05652118	2.19
ASN 06223699	2.19
ASN 06893134	2.19
ASN 08953479	2.19
T5585722	2.19
T5661448	2.19
ASN 03221761	2.18
ASN 03433865	2.18
ASN 04481606	2.18
ASN 04785997	2.18
ASN 05378149	2.18
ASN 05544105	2.18
ASN 06291071	2.18
ASN 06978290	2.18
T5672459	2.18
T5675813	2.18
ASN 03366572	2.17
ASN 05076739	2.17
ASN 05587934	2.17
ASN 06016995	2.17
T5604960	2.17
T5639792	2.17
T5647218	2.17
T5673235	2.17
T5696052	2.17
ASN 03801447	2.16
ASN 05835912	2.16
ASN 06752432	2.16
ASN 07101546	2.16
T5578430	2.16
T5684648	2.16
ASN 06866440	2.15
ASN 07110367	2.15
T5614959	2.15
T5681572	2.15
ASN 05212464	2.14
ASN 05378759	2.14
ASN 07854712	2.14
T5633215	2.14
T6034344	2.14
ASN 02104647	2.13
ASN 04461956	2.13
ASN 05378920	2.13
ASN 06359105	2.13
ASN 06578010	2.13
T5578598	2.13
T5600562	2.13
T5692196	2.13
ASN 05020123	2.12
ASN 06217845	2.12
ASN 08896714	2.12
ASN 02915650	2.11
ASN 03365190	2.11
ASN 04038792	2.11
ASN 05099949	2.11
ASN 06117488	2.11
ASN 02054105	2.1
ASN 05114971	2.1
ASN 05543884	2.1
ASN 06351094	2.1
PROSTAGLANDIN I2 Na	2.1
T5588351	2.1
T5614144	2.1
T5629725	2.1
T5823707	2.1
ASN 05108289	2.09
ASN 05557517	2.09
ASN 07062722	2.09
ASN 07880694	2.09
ASN 08735135	2.09
ASN 09858620	2.09
T5606855	2.09
T5647707	2.09
T5661648	2.09
T5931146	2.09
ASN 03108043	2.08
ASN 05544724	2.08
ASN 05545747	2.08
ASN 05551015	2.08
ASN 06118142	2.08
ASN 06223232	2.08
ASN 06291423	2.08
ASN 07026676	2.08
ASN 07276569	2.08
ASN 08241408	2.08
PROSTAGLANDIN F1a	2.08
T5620630	2.08
T5678696	2.08
T5693281	2.08
ASN 03323673	2.07
ASN 03929893	2.07
ASN 05546221	2.07
ASN 06016894	2.07
ASN 06231555	2.07
ASN 06955988	2.07
T5582368	2.07
T5639718	2.07
ASN 03270416	2.06
ASN 06232702	2.06
ASN 06466120	2.06
ASN 06568852	2.06
ASN 08269513	2.06
T5588380	2.06
T5607784	2.06
T5634593	2.06
T5644483	2.06
T5692739	2.06
T5829856	2.06
ASN 02107324	2.05
ASN 03365381	2.05
ASN 04042176	2.05
ASN 05387986	2.05
ASN 06546382	2.05
T5620125	2.05
T5690634	2.05
T5693293	2.05
ASN 05380501	2.04
ASN 05542023	2.04
ASN 05946126	2.04
ASN 06578024	2.04
H-9	2.04
T5582543	2.04
T5645589	2.04
T5688094	2.04
ASN 02642145	2.03
ASN 05638823	2.03
ASN 05702950	2.03
ASN 06217868	2.03
ASN 06223066	2.03
T5572148	2.03
T5580688	2.03
T5606894	2.03
T5679449	2.03
T5704037	2.03
ASN 04455519	2.02
ASN 05544434	2.02
ASN 06223697	2.02
ASN 06572571	2.02
ASN 06918798	2.02
ASN 06942618	2.02
ASN 08239865	2.02
ASN 03160103	2.01
ASN 04455327	2.01
ASN 05917589	2.01
ASN 05989471	2.01
Linoleoyl dopamine	2.01
T5632549	2.01
ASN 03269249	2
ASN 03365057	2
ASN 05786902	2
ASN 05917329	2
ASN 06533087	2
ASN 06578030	2
ASN 06580073	2
ASN 06978085	2
ASN 08240437	2
T5570068	2
T5615794	2
T5629656	2
T5642662	2
T5697534	2
1,2-DIOCTANOYL-SN-GLYCEROL	1.99
ASN 03068468	1.99
ASN 04192404	1.99
ASN 05823863	1.99
ASN 06291990	1.99
ASN 06351585	1.99
ASN 06584164	1.99
ASN 06865779	1.99
ASN 07110237	1.99
QUININE	1.99
T5590125	1.99
T5654672	1.99
2-DHLA-PAF	1.98
ASN 05834426	1.98
ASN 06291951	1.98
ASN 06565951	1.98
ASN 06570806	1.98
ASN 07184703	1.98
T5610227	1.98
T5612527	1.98
T5680245	1.98
T5703987	1.98
T5720170	1.98
T5941977	1.98
ASN 03801473	1.97
ASN 05447834	1.97
ASN 06942058	1.97
ASN 06977006	1.97
IMIDAZOLE-4-ACETIC ACID HCl	1.97
T6108770	1.97
ASN 03068569	1.96
ASN 03434837	1.96
ASN 03572144	1.96
ASN 04042834	1.96
ASN 04421887	1.96
ASN 05114765	1.96
ASN 05212026	1.96
ASN 05547323	1.96
ASN 05988649	1.96
ASN 06118691	1.96
ASN 06353690	1.96
T5693152	1.96
ASN 03016794	1.95
ASN 03437481	1.95
ASN 04420522	1.95
ASN 05104040	1.95
ASN 05105730	1.95
ASN 05112844	1.95
ASN 05300615	1.95
ASN 05546626	1.95
ASN 05812019	1.95
ASN 05917315	1.95
ASN 06469378	1.95
ASN 08240436	1.95
T5572040	1.95
T5654000	1.95
ASN 05588317	1.94
ASN 05809180	1.94
ASN 06353027	1.94
ASN 06397116	1.94
ASN 06866135	1.94
ASN 07272220	1.94
T5612631	1.94
ASN 04024302	1.93
ASN 05945805	1.93
ASN 05987983	1.93
ASN 06236353	1.93
ASN 06396441	1.93
ASN 08218230	1.93
ASN 08828903	1.93
T5591797	1.93
T5622743	1.93
T5639847	1.93
T5640015	1.93
T5684778	1.93
T5829737	1.93
ASN 04039953	1.92
ASN 05083216	1.92
ASN 05546414	1.92
ASN 05915650	1.92
ASN 05941760	1.92
ASN 06236666	1.92
ASN 06914898	1.92
ASN 06941712	1.92
ASN 09858464	1.92
T5580973	1.92
T5664595	1.92
T5700088	1.92
ASN 04454108	1.91
ASN 04756908	1.91
ASN 05548528	1.91
ASN 05554823	1.91
ASN 05941593	1.91
ASN 05941780	1.91
ASN 05989311	1.91
ASN 06571180	1.91
ASN 07052477	1.91
ASN 08731175	1.91
PROSTAGLANDIN B1	1.91
T5628566	1.91
T5647101	1.91
ASN 03156620	1.9
ASN 03365024	1.9
ASN 03572724	1.9
ASN 05299695	1.9
ASN 05938300	1.9
ASN 06916510	1.9
ASN 06918802	1.9
ASN 07187148	1.9
ASN 08245852	1.9
T5686713	1.9
T5702791	1.9
ASN 03578519	1.89
ASN 04428363	1.89
ASN 05083304	1.89
ASN 05100722	1.89
ASN 06349195	1.89
ASN 06866076	1.89
ASN 06978772	1.89
ASN 06978847	1.89
ASN 07078324	1.89
ASN 08896079	1.89
H-7	1.89
T5578597	1.89
T5646473	1.89
T5671955	1.89
T5673058	1.89
T5807616	1.89
ASN 03981099	1.88
ASN 05557967	1.88
ASN 05988075	1.88
ASN 06152827	1.88
ASN 06532381	1.88
ASN 07276833	1.88
ASN 08737129	1.88
Linoleoyl GABA	1.88
T5624119	1.88
T5632726	1.88
ASN 03364997	1.87
ASN 03579647	1.87
ASN 04037272	1.87
ASN 04480656	1.87
ASN 05545859	1.87
ASN 05587478	1.87
ASN 05815224	1.87
ASN 06351084	1.87
ASN 06578985	1.87
ASN 06581050	1.87
ASN 09646865	1.87
LEUKOTRIENE B3	1.87
T5570138	1.87
T5690369	1.87
ASN 04457620	1.86
ASN 05544110	1.86
ASN 05658157	1.86
ASN 05977355	1.86
ASN 06223108	1.86
ASN 06366860	1.86
ASN 06540945	1.86
ASN 06941509	1.86
ASN 07441590	1.86
ASN 09858692	1.86
ASN 04369471	1.85
ASN 05546119	1.85
ASN 05919666	1.85
ASN 05988671	1.85
ASN 06235146	1.85
ASN 06977361	1.85
T5603968	1.85
T5720244	1.85
ASN 03204243	1.84
ASN 04039984	1.84
ASN 05446656	1.84
ASN 05672142	1.84
ASN 05940665	1.84
ASN 06016654	1.84
ASN 06578034	1.84
ASN 07153556	1.84
ASN 07369720	1.84
ASN 07460856	1.84
T5578368	1.84
T5588212	1.84
T5633634	1.84
T5655425	1.84
T5661498	1.84
T5700079	1.84
ASN 03156858	1.83
ASN 03778618	1.83
ASN 04187316	1.83
ASN 04369479	1.83
ASN 04890406	1.83
ASN 05544312	1.83
ASN 05941309	1.83
ASN 06402839	1.83
ASN 06913469	1.83
ASN 08232470	1.83
ASN 09646912	1.83
ML-9	1.83
T5631490	1.83
T5656919	1.83
ASN 03321876	1.82
ASN 03798549	1.82
ASN 04051467	1.82
ASN 04456263	1.82
ASN 05256780	1.82
ASN 05545730	1.82
ASN 06232252	1.82
ASN 06749044	1.82
ASN 06915230	1.82
ASN 08737142	1.82
T5598353	1.82
T5616853	1.82
T5619831	1.82
ASN 01906671	1.81
ASN 03797085	1.81
ASN 04889269	1.81
ASN 05300622	1.81
ASN 05555982	1.81
ASN 06220811	1.81
ASN 06346944	1.81
ASN 06365351	1.81
ASN 06547716	1.81
ASN 06583345	1.81
ASN 06866355	1.81
ASN 07878482	1.81
ASN 09627238	1.81
INDIRUBIN	1.81, -1.03
T5642778	1.81
T5686711	1.81
T5690913	1.81
ASN 03930808	1.8
ASN 05552037	1.8
ASN 06564749	1.8
ASN 07082604	1.8
ASN 07331332	1.8
HA-1004	1.8
T5582518	1.8
T5600588	1.8
ASN 03430740	1.79
ASN 03796621	1.79
ASN 04394135	1.79
ASN 05112213	1.79
ASN 05817040	1.79
ASN 05989274	1.79
ASN 06291276	1.79
ASN 09646904	1.79
T5586387	1.79
T5588195	1.79
T5628562	1.79
T5660424	1.79
ASN 03019199	1.78
ASN 04373611	1.78
ASN 05394742	1.78
ASN 05557976	1.78
ASN 05806432	1.78
ASN 06152828	1.78
ASN 06396497	1.78
ASN 06956286	1.78
ASN 07083114	1.78
ASN 08748561	1.78
ASN 08828836	1.78
T5639695	1.78
T5806119	1.78
T5829679	1.78
U-75302	1.78
ASN 03793653	1.77
ASN 05544145	1.77
ASN 05588974	1.77
ASN 05988115	1.77
ASN 06291453	1.77
ASN 08911175	1.77
T5647634	1.77
T5650431	1.77
T5656346	1.77
T5683652	1.77
ASN 05547416	1.76
ASN 05553141	1.76
ASN 05914991	1.76
ASN 05919141	1.76
ASN 05924443	1.76
ASN 06580085	1.76
ASN 07104484	1.76
ASN 08223940	1.76
ASN 09047978	1.76
T5589652	1.76
T5656997	1.76
T5684619	1.76
ASN 02254628	1.75
ASN 02539250	1.75
ASN 03109300	1.75
ASN 04039206	1.75
ASN 04481604	1.75
ASN 04889288	1.75
ASN 05110946	1.75
ASN 05446548	1.75
ASN 05552487	1.75
ASN 06866127	1.75
ASN 03156570	1.74
ASN 03776974	1.74
ASN 05804057	1.74
ASN 05940155	1.74
ASN 06571327	1.74
ASN 06578667	1.74
ASN 07185977	1.74
ASN 08910031	1.74
T5570080	1.74
T5588446	1.74
T5614528	1.74
T5642521	1.74
T5665848	1.74
T5675951	1.74
T5726487	1.74
T5829622	1.74
ASN 03270437	1.73
ASN 04061361	1.73
ASN 04195560	1.73
ASN 04369023	1.73
ASN 04420010	1.73
ASN 05112877	1.73
ASN 05113626	1.73
ASN 05378898	1.73
ASN 05558939	1.73
ASN 06232807	1.73
ASN 06460746	1.73
ASN 06913416	1.73
T5637029	1.73
T5692674	1.73
ASN 02538215	1.72
ASN 03929619	1.72
ASN 04482393	1.72
ASN 05050678	1.72
ASN 05395575	1.72
ASN 05544038	1.72
ASN 05919591	1.72
ASN 05988137	1.72
ASN 06468105	1.72
ASN 07885881	1.72
ASN 08233592	1.72
T5572592	1.72
T5604959	1.72
T5626852	1.72
T5636902	1.72
T5647490	1.72
T5726315	1.72
ASN 01556196	1.71
ASN 03367829	1.71
ASN 05299478	1.71
ASN 06117352	1.71
ASN 06396437	1.71
ASN 06533101	1.71
ASN 06744255	1.71
ASN 06751185	1.71
ASN 07102669	1.71
ASN 07820432	1.71
ASN 08745554	1.71
T5630041	1.71
T5635799	1.71
T5661443	1.71
ASN 02562626	1.7
ASN 02834140	1.7
ASN 03368258	1.7
ASN 04372571	1.7
ASN 04392475	1.7
ASN 04457495	1.7
ASN 05110852	1.7
ASN 05254780	1.7
ASN 05588106	1.7
ASN 05786966	1.7
ASN 06351456	1.7
ASN 06482146	1.7
ASN 06558684	1.7
ASN 06978066	1.7
ASN 07479194	1.7
T5628498	1.7
T5640653	1.7
T5667428	1.7
T5675874	1.7
T6044293	1.7
ASN 05106212	1.69
ASN 05113435	1.69
ASN 05544140	1.69
ASN 05554190	1.69
ASN 05988130	1.69
ASN 06117412	1.69
ASN 06866288	1.69
ASN 06956242	1.69
ASN 09042930	1.69
T5629868	1.69
T5704014	1.69
T5942735	1.69
ASN 03367438	1.68
ASN 03580234	1.68
ASN 04370646	1.68
ASN 04888760	1.68
ASN 05062217	1.68
ASN 05558102	1.68
ASN 05805928	1.68
ASN 05988061	1.68
ASN 05988592	1.68
ASN 06237156	1.68
ASN 06345657	1.68
ASN 06591041	1.68
ASN 06744244	1.68
ASN 06919454	1.68
ASN 06919464	1.68
ASN 06977115	1.68
ASN 07191370	1.68
ASN 08822371	1.68
ASN 08831295	1.68
T5643451	1.68
T5693827	1.68
ASN 03778224	1.67
ASN 04886612	1.67
ASN 05262640	1.67
ASN 05545663	1.67
ASN 05588405	1.67
ASN 06574642	1.67
ASN 08736729	1.67
ASN 08909828	1.67
T5683722	1.67
T5697500	1.67
T5724531	1.67
ASN 02137709	1.66
ASN 03801374	1.66
ASN 04196996	1.66
ASN 04362536	1.66
ASN 04457700	1.66
ASN 05103603	1.66
ASN 05113421	1.66
ASN 05257175	1.66
ASN 05548178	1.66
ASN 06237541	1.66
ASN 06913531	1.66
ASN 06919236	1.66
ASN 09858716	1.66
T5578203	1.66
T5591951	1.66
T5692791	1.66
ASN 02834393	1.65
ASN 03069695	1.65
ASN 03326156	1.65
ASN 03436765	1.65
ASN 04359699	1.65
ASN 05103869	1.65
ASN 05299820	1.65
ASN 06351455	1.65
ASN 06399073	1.65
gamma-D-GLUTAMYLGLYCINE	1.65
p-METHOXYPHENYLETHYLAMINE	1.65
T5611536	1.65
T5639904	1.65
T5668770	1.65
ASN 02592932	1.64
ASN 03323738	1.64
ASN 03364998	1.64
ASN 03983943	1.64
ASN 04260017	1.64
ASN 04889148	1.64
ASN 05446540	1.64
ASN 06117386	1.64
ASN 06351248	1.64
ASN 06532466	1.64
ASN 06534837	1.64
ASN 06579585	1.64
ASN 08253722	1.64
T5572477	1.64
T5639682	1.64
ASN 03223464	1.63
ASN 04361391	1.63
ASN 04373587	1.63
ASN 05551361	1.63
ASN 06117227	1.63
ASN 06977845	1.63
ASN 07088040	1.63
ASN 09173382	1.63
T5586167	1.63
T5622132	1.63
T5652573	1.63
T5679376	1.63
ASN 04450096	1.62
ASN 05300158	1.62
ASN 06567187	1.62
ASN 06864872	1.62
ASN 08223726	1.62
ASN 09646829	1.62
ASN 09646840	1.62
ASN 09646853	1.62
ASN 09858082	1.62
T5577003	1.62
T5590481	1.62
ASN 03156654	1.61
ASN 03367935	1.61
ASN 04459860	1.61
ASN 04935600	1.61
ASN 05804195	1.61
ASN 06116738	1.61
ASN 06231757	1.61
ASN 06350204	1.61
ASN 06399188	1.61
ASN 06401068	1.61
ASN 06547660	1.61
ASN 06744044	1.61
ASN 07834372	1.61
ASN 09858700	1.61
T5589502	1.61
T5590503	1.61
T5633029	1.61
T5636682	1.61
T5639713	1.61
T5639881	1.61
T5656906	1.61
T5672698	1.61
T5677504	1.61
T5726292	1.61
T5828412	1.61
ASN 01067326	1.6
ASN 02790141	1.6
ASN 03983583	1.6
ASN 04040032	1.6
ASN 04191595	1.6
ASN 04259811	1.6
ASN 04756057	1.6
ASN 05378536	1.6
ASN 05544420	1.6
ASN 05587926	1.6
ASN 05939707	1.6
ASN 06291245	1.6
ASN 06578434	1.6
ASN 06580116	1.6
ASN 06955696	1.6
RETINOIC ACID, ALL TRANS	1.6
T5577027	1.6
T5614399	1.6
T5617342	1.6
T5640079	1.6
T5642727	1.6
T5644664	1.6
T5649304	1.6
T5666348	1.6
T5682857	1.6
T5689250	1.6
ASN 03780422	1.59
ASN 04050323	1.59
ASN 04482610	1.59
ASN 05108197	1.59
ASN 05546280	1.59
ASN 05648417	1.59
ASN 05813401	1.59
ASN 05988766	1.59
ASN 06396785	1.59
ASN 06460739	1.59
ASN 06532424	1.59
ASN 06567517	1.59
ASN 07078306	1.59
ASN 07110251	1.59
ASN 07133342	1.59
ASN 07850950	1.59
ASN 08830941	1.59
ASN 09170886	1.59
T5614816	1.59
T5616605	1.59
T5616838	1.59
T5674267	1.59
T5686738	1.59
T5688434	1.59
T5693758	1.59
ASN 03204923	1.58
ASN 03367913	1.58
ASN 04893434	1.58
ASN 05300833	1.58
ASN 05683245	1.58
ASN 05805249	1.58
ASN 06232179	1.58
ASN 06481561	1.58
ASN 06751196	1.58
ASN 06913935	1.58
ASN 06977589	1.58
ASN 06977601	1.58
ASN 08896077	1.58
FLUSPIRILINE	1.58
LEUKOTRIENE E4	1.58
T5620629	1.58
T5623781	1.58
T5627139	1.58
T5670794	1.58
T5674054	1.58
T5718874	1.58
T5724645	1.58
T5828395	1.58
ASN 02617441	1.57
ASN 03107988	1.57
ASN 04363959	1.57
ASN 05109963	1.57
ASN 05303450	1.57
ASN 05916581	1.57
ASN 05990659	1.57
ASN 06347203	1.57
ASN 06749444	1.57
ASN 07883324	1.57
ASN 08749808	1.57
ASN 09123686	1.57
T5578542	1.57
T5617998	1.57
T5681570	1.57
T5699663	1.57
TMB-8	1.57
ASN 02832993	1.56
ASN 03367250	1.56
ASN 04039600	1.56
ASN 05109573	1.56
ASN 05303610	1.56
ASN 05558772	1.56
ASN 05561338	1.56
ASN 05588668	1.56
ASN 05675790	1.56
ASN 06152830	1.56
ASN 06351604	1.56
ASN 06588192	1.56
ASN 06978895	1.56
ML-7	1.56
T5604196	1.56
T5619627	1.56
T5634680	1.56
T5634741	1.56
T5681059	1.56
T5681062	1.56
T5721922	1.56
ASN 02993462	1.55
ASN 03200499	1.55
ASN 03578210	1.55
ASN 04027126	1.55
ASN 04037146	1.55
ASN 04257431	1.55
ASN 04482568	1.55
ASN 05082962	1.55
ASN 05113430	1.55
ASN 05811577	1.55
ASN 05915126	1.55
ASN 05915774	1.55
ASN 05918407	1.55
ASN 05938390	1.55
ASN 06235686	1.55
ASN 06482525	1.55
ASN 06563843	1.55
ASN 06567425	1.55
ASN 06867978	1.55
ASN 07824654	1.55
ASN 07876453	1.55
ASN 07887218	1.55
ASN 09042072	1.55
ASN 09069246	1.55
ASN 09858014	1.55
Oleoyl GABA	1.55
T5589405	1.55
T5598013	1.55
T5700073	1.55
T5741067	1.55
ASN 02170675	1.54
ASN 04454654	1.54
ASN 04890428	1.54
ASN 05044798	1.54
ASN 05114189	1.54
ASN 05990589	1.54
ASN 06117413	1.54
ASN 06153644	1.54
ASN 06230995	1.54
ASN 06237681	1.54
ASN 06291339	1.54
ASN 06354995	1.54
T5693829	1.54
ASN 01906620	1.53
ASN 04026560	1.53
ASN 04367323	1.53
ASN 04461895	1.53
ASN 05099524	1.53
ASN 05104847	1.53
ASN 05113933	1.53
ASN 05383342	1.53
ASN 05544299	1.53
ASN 05548694	1.53
ASN 06117102	1.53
ASN 09857967	1.53
T5614925	1.53
T5616750	1.53
T5642602	1.53
T5676272	1.53
T5677497	1.53
T5695366	1.53
ASN 03579016	1.52
ASN 05088454	1.52
ASN 05377151	1.52
ASN 05552473	1.52
ASN 06015412	1.52
ASN 06016634	1.52
ASN 06235546	1.52
ASN 06291250	1.52
ASN 06365366	1.52
ASN 06462648	1.52
ASN 06744199	1.52
ASN 07461150	1.52
Dihomo-gamma-linolenoyl dopamine	1.52
T5601545	1.52
T5639541	1.52
T5645019	1.52
T5655105	1.52
T5718473	1.52
T5724310	1.52
ASN 02993241	1.51
ASN 03323428	1.51
ASN 03430795	1.51
ASN 03436121	1.51
ASN 04046153	1.51
ASN 04456109	1.51
ASN 05104524	1.51
ASN 05303287	1.51
ASN 05552038	1.51
ASN 05588013	1.51
ASN 06365710	1.51
ASN 06482851	1.51
ASN 06579278	1.51
ASN 06579555	1.51
ASN 07278003	1.51
ASN 07331286	1.51
ASN 08223486	1.51
ASN 08731295	1.51
ASN 09858633	1.51
T5620238	1.51
T5630341	1.51
T5647618	1.51
T5647710	1.51
T5698854	1.51
T5724229	1.51
T6144625	1.51
ASN 04192691	1.5
ASN 04250777	1.5
ASN 04373718	1.5
ASN 05304780	1.5
ASN 05588022	1.5
ASN 05597291	1.5
ASN 05672189	1.5
ASN 05803898	1.5
ASN 05923436	1.5
ASN 06016659	1.5
ASN 06481767	1.5
ASN 06533368	1.5
ASN 06536295	1.5
ASN 06911585	1.5
T5620126	1.5
T5620792	1.5
T5628051	1.5
T5669608	1.5
T5693774	1.5
T5699214	1.5
T5718472	1.5
AG-494	1.49
ASN 03269250	1.49
ASN 03889883	1.49
ASN 04370193	1.49
ASN 04370222	1.49
ASN 05300841	1.49
ASN 05682712	1.49
ASN 05988078	1.49
ASN 06153155	1.49
ASN 06220761	1.49
ASN 06236163	1.49
ASN 06483017	1.49
ASN 07186620	1.49
ASN 07370789	1.49
ASN 07826730	1.49
ASN 08250564	1.49
ASN 08744756	1.49
ASN 08912038	1.49
T5571760	1.49
T5589362	1.49
T5633054	1.49
T5641956	1.49
T5673171	1.49
T5674224	1.49
T5718449	1.49
ASN 02833705	1.48
ASN 02915689	1.48
ASN 03367544	1.48
ASN 04755596	1.48
ASN 05104339	1.48
ASN 05298044	1.48
ASN 05553653	1.48
ASN 05657590	1.48
ASN 05659704	1.48
ASN 05675785	1.48
ASN 05940739	1.48
ASN 05942058	1.48
ASN 07153587	1.48
ASN 07186578	1.48
ASN 07200193	1.48
ASN 07876677	1.48
ASN 09170090	1.48
T5587700	1.48
T5589501	1.48
T5625772	1.48
T5633554	1.48
T5639997	1.48
T5671926	1.48
ASN 04040358	1.47
ASN 05110835	1.47
ASN 05114299	1.47
ASN 05378776	1.47
ASN 05462335	1.47
ASN 06019062	1.47
ASN 06546973	1.47
ASN 06547715	1.47
ASN 07153558	1.47
ASN 09646852	1.47
ASN 09858864	1.47
PALMITOYL DOPAMINE	1.47, -0.171
T5579456	1.47
T5621062	1.47
T5623437	1.47
T5645594	1.47
T5652526	1.47
T5685872	1.47
T5718436	1.47
ASN 03365333	1.46
ASN 03432477	1.46
ASN 04210743	1.46
ASN 04369478	1.46
ASN 04481079	1.46
ASN 05101624	1.46
ASN 05298076	1.46
ASN 05305130	1.46
ASN 05396676	1.46
ASN 06117512	1.46
ASN 06977459	1.46
T5600371	1.46
T5623375	1.46
T5702155	1.46
T5828409	1.46
9-CIS RETINOIC ACID	1.45
ASN 01541953	1.45
ASN 02562725	1.45
ASN 03430718	1.45
ASN 03796020	1.45
ASN 04366006	1.45
ASN 04888878	1.45
ASN 05076734	1.45
ASN 05100841	1.45
ASN 05392041	1.45
ASN 05587913	1.45
ASN 05659218	1.45
ASN 05916767	1.45
ASN 06146903	1.45
ASN 06232982	1.45
ASN 06365028	1.45
ASN 06482918	1.45
ASN 07331305	1.45
ASN 07441685	1.45
ASN 08834178	1.45
ASN 08911830	1.45
PROSTAGLANDIN E1	1.45
T5622055	1.45
T5690920	1.45
T5694250	1.45
T5700509	1.45
T5807583	1.45
T5850335	1.45
ASN 03579113	1.44
ASN 04049904	1.44
ASN 04195464	1.44
ASN 05102806	1.44
ASN 05262675	1.44
ASN 05552737	1.44
ASN 05588969	1.44
ASN 05682327	1.44
ASN 05919016	1.44
ASN 06232523	1.44
ASN 06291279	1.44
ASN 06352008	1.44
ASN 06579209	1.44
ASN 07272254	1.44
ASN 09858204	1.44
ASN 09859004	1.44
PROSTAGLANDIN D2	1.44
T5598391	1.44
T5637440	1.44
ASN 02053797	1.43
ASN 05104253	1.43
ASN 05107242	1.43
ASN 05544723	1.43
ASN 05545126	1.43
ASN 05914916	1.43
ASN 05987678	1.43
ASN 06256099	1.43
ASN 06291916	1.43
ASN 06532650	1.43
ASN 06955298	1.43
ASN 06977628	1.43
ASN 07101497	1.43
T5598343	1.43
T5604654	1.43
T5610128	1.43
T5612603	1.43
T5628465	1.43
T5628497	1.43
T5636900	1.43
T5637068	1.43
T5648457	1.43
T5650280	1.43
T5700787	1.43
T5705774	1.43
T5715627	1.43
1,2-DIDECANOYL-GLYCEROL (10:0)	1.42
ASN 02107035	1.42
ASN 03206625	1.42
ASN 04038141	1.42
ASN 04445536	1.42
ASN 04455343	1.42
ASN 04456209	1.42
ASN 05114873	1.42
ASN 05379516	1.42
ASN 05546236	1.42
ASN 05547773	1.42
ASN 05914891	1.42
ASN 06152782	1.42
ASN 06396388	1.42
T5582943	1.42
T5589898	1.42
T5612346	1.42
T5615851	1.42
T5624190	1.42
T5627819	1.42
T5633387	1.42
T5642734	1.42
T5669445	1.42
T5690930	1.42
ASN 03018610	1.41
ASN 03366865	1.41
ASN 05546427	1.41
ASN 05584232	1.41
ASN 05914881	1.41
ASN 05916746	1.41
ASN 05918511	1.41
ASN 06068479	1.41
ASN 06156252	1.41
ASN 06236038	1.41
ASN 06536856	1.41
ASN 07878863	1.41
ASN 10320973	1.41
T5588528	1.41
T5604172	1.41
T5724216	1.41
5-METHOXY-N,N-DIMETHYLTRYPTAMINE	1.4
ASN 04193351	1.4
ASN 05019901	1.4
ASN 05021445	1.4
ASN 05256008	1.4
ASN 05256231	1.4
ASN 05260717	1.4
ASN 05544663	1.4
ASN 05651689	1.4
ASN 05682205	1.4
ASN 05988652	1.4
ASN 06152769	1.4
ASN 06217553	1.4
ASN 06482713	1.4
ASN 06568832	1.4
ASN 06578020	1.4
ASN 07062621	1.4
ASN 07265151	1.4
ASN 07275060	1.4
T5628866	1.4
T5650275	1.4
T5658626	1.4
ASN 03068708	1.39
ASN 04042464	1.39
ASN 04194277	1.39
ASN 04249532	1.39
ASN 05546251	1.39
ASN 05651631	1.39
ASN 06019666	1.39
ASN 06396881	1.39
ASN 06539800	1.39
ASN 06548616	1.39
ASN 06918089	1.39
ASN 07088042	1.39
ASN 07196881	1.39
ASN 08223737	1.39
T5571654	1.39
T5604295	1.39
T5630931	1.39
T5642797	1.39
T5666407	1.39
T5718334	1.39
T5720228	1.39
ASN 02993634	1.38
ASN 04208897	1.38
ASN 04888819	1.38
ASN 05546271	1.38
ASN 05548630	1.38
ASN 05657004	1.38
ASN 05945831	1.38
ASN 05991154	1.38
ASN 06291842	1.38
ASN 06346957	1.38
ASN 06351510	1.38
ASN 06466481	1.38
ASN 06546739	1.38
ASN 06977977	1.38
ASN 07851394	1.38
ASN 09857972	1.38
T5606988	1.38
T5617096	1.38
T5633277	1.38
T5655786	1.38
T5674429	1.38
T5676291	1.38
T5693135	1.38
T5705285	1.38
ASN 03579696	1.37
ASN 04456150	1.37
ASN 05102881	1.37
ASN 05114289	1.37
ASN 05260124	1.37
ASN 05295550	1.37
ASN 05545555	1.37
ASN 05566511	1.37
ASN 05682212	1.37
ASN 05682429	1.37
ASN 05939284	1.37
ASN 06121768	1.37
ASN 06481866	1.37
ASN 07117717	1.37
ASN 07275722	1.37
Dihomo-gamma-linolenoyl GABA	1.37
LYSO-PAF C16	1.37
T5571812	1.37
T5601359	1.37
T5623331	1.37
T5661516	1.37
T5674048	1.37
T5693594	1.37
ASN 01920154	1.36
ASN 02053851	1.36
ASN 04188290	1.36
ASN 05109645	1.36
ASN 05303619	1.36
ASN 05672421	1.36
ASN 05834967	1.36
ASN 05920078	1.36
ASN 06014815	1.36
ASN 06481433	1.36
ASN 06576056	1.36
ASN 06912341	1.36
ASN 06955414	1.36
ASN 07130116	1.36
ASN 07162122	1.36
ASN 07186254	1.36
ASN 07272278	1.36
ASN 08749135	1.36
ASN 09586440	1.36
T5588194	1.36
T5604319	1.36
T5605511	1.36
T5628400	1.36
T5665567	1.36
T5666852	1.36
T5702943	1.36
ASN 02617550	1.35
ASN 03270708	1.35
ASN 05553344	1.35
ASN 05554828	1.35
ASN 05988749	1.35
ASN 06366863	1.35
ASN 06913481	1.35
ASN 08735116	1.35
GAMMA-LINOLENIC ACID (18:3 n-6)	1.35
T5584921	1.35
T5585108	1.35
T5589347	1.35
T5591540	1.35
T5592837	1.35
T5624834	1.35
T5634487	1.35
T5684069	1.35
T5696385	1.35
T5718511	1.35
T5828413	1.35
ZM 449829	1.35
ASN 03778124	1.34
ASN 04365754	1.34
ASN 05076072	1.34
ASN 05104309	1.34
ASN 05107587	1.34
ASN 05297948	1.34
ASN 05786937	1.34
ASN 05804216	1.34
ASN 05944609	1.34
ASN 06118178	1.34
ASN 06236946	1.34
ASN 06291999	1.34
ASN 06354070	1.34
ASN 06482570	1.34
ASN 06565164	1.34
ASN 06578038	1.34
ASN 06580091	1.34
ASN 06749550	1.34
ASN 06865014	1.34
ASN 07078330	1.34
ASN 08269974	1.34
ASN 08969809	1.34
ASN 09858463	1.34
T5598539	1.34
T5604297	1.34
T5628696	1.34
T5648753	1.34
T5654815	1.34
T5669067	1.34
T5679846	1.34
T5690309	1.34
T5986975	1.34
ASN 01516438	1.33
ASN 02071374	1.33
ASN 02241824	1.33
ASN 03276522	1.33
ASN 05102670	1.33
ASN 05113470	1.33
ASN 05588734	1.33
ASN 05589895	1.33
ASN 05683335	1.33
ASN 06224803	1.33
ASN 06396871	1.33
ASN 06533271	1.33
ASN 06744479	1.33
ASN 06865174	1.33
ASN 06941524	1.33
ASN 07162895	1.33
ASN 07186775	1.33
ASN 07879900	1.33
ASN 08732903	1.33
ASN 08912012	1.33
ASN 09583963	1.33
T5601921	1.33
T5602773	1.33
T5620179	1.33
T5667639	1.33
T5673796	1.33
T5686739	1.33
T5697786	1.33
T5718192	1.33
T5720101	1.33
T5721288	1.33
T5879507	1.33
1,25-DIHYDROXYVITAMIN D3	1.32
ASN 03156890	1.32
ASN 03432433	1.32
ASN 03438960	1.32
ASN 03578478	1.32
ASN 04191574	1.32
ASN 04886954	1.32
ASN 05303552	1.32
ASN 05544668	1.32
ASN 05941303	1.32
ASN 06223048	1.32
ASN 06223049	1.32
ASN 06236309	1.32
ASN 06352272	1.32
ASN 06533279	1.32
ASN 06579976	1.32
ASN 06580576	1.32
ASN 06748959	1.32
ASN 07062682	1.32
ASN 07370089	1.32
ASN 07806356	1.32
ASN 07806368	1.32
ASN 09858524	1.32
ASN 09858830	1.32
PAF C18	1.32
T5582293	1.32
T5582627	1.32
T5598567	1.32
T5602853	1.32
T5689482	1.32
T5693754	1.32
T5720246	1.32
1-ACYL-PAF	1.31
ASN 03269259	1.31
ASN 03581499	1.31
ASN 04059942	1.31
ASN 05100380	1.31
ASN 05545070	1.31
ASN 05546643	1.31
ASN 05920096	1.31
ASN 07331190	1.31
T5589921	1.31
T5602912	1.31
T5642545	1.31
T5646978	1.31
T5653564	1.31
T5654075	1.31
T5680480	1.31
T5700501	1.31
T5724507	1.31
T5807721	1.31
ASN 02240710	1.3
ASN 03108265	1.3
ASN 03777504	1.3
ASN 04051223	1.3
ASN 04190106	1.3
ASN 04456279	1.3
ASN 05114295	1.3
ASN 05258477	1.3
ASN 05548340	1.3
ASN 05668000	1.3
ASN 05682290	1.3
ASN 06482516	1.3
ASN 06532641	1.3
ASN 06532738	1.3
ASN 06571383	1.3
ASN 06866245	1.3
ASN 07113625	1.3
ASN 07130137	1.3
ASN 07153548	1.3
ASN 07441524	1.3
ASN 08812426	1.3
ASN 08910478	1.3
T5601664	1.3
T5641957	1.3
T5647080	1.3
T5670289	1.3
T5670830	1.3
T5690534	1.3
T5692259	1.3
T5721660	1.3
T5726353	1.3
ASN 02137923	1.29
ASN 03929982	1.29
ASN 04448085	1.29
ASN 04448381	1.29
ASN 04757426	1.29
ASN 05044617	1.29
ASN 05044621	1.29
ASN 05108659	1.29
ASN 05545501	1.29
ASN 05550740	1.29
ASN 05588373	1.29
ASN 05941759	1.29
ASN 05942268	1.29
ASN 06217640	1.29
ASN 06291153	1.29
ASN 06396354	1.29
ASN 06398056	1.29
ASN 06398718	1.29
ASN 06549313	1.29
ASN 06563213	1.29
ASN 06867506	1.29
ASN 07110543	1.29
ASN 09114456	1.29
T5611226	1.29
T5633528	1.29
T5635093	1.29
T5637443	1.29
T5660739	1.29
T5670598	1.29
T5671871	1.29
T5724356	1.29
13(S)-HODE	1.28
ASN 01248503	1.28
ASN 03155801	1.28
ASN 05102066	1.28
ASN 05102258	1.28
ASN 05106082	1.28
ASN 05555763	1.28
ASN 05988704	1.28
ASN 06153015	1.28
ASN 06361194	1.28
ASN 06387524	1.28
ASN 06482527	1.28
ASN 06545955	1.28
ASN 06566420	1.28
ASN 06567432	1.28
ASN 07130158	1.28
ASN 08242309	1.28
ASN 08734468	1.28
ASN 09858718	1.28
OLOMOUCINE	1.28
T5609927	1.28
T5620239	1.28
T5640024	1.28
T5896458	1.28
ASN 02170725	1.27
ASN 03365368	1.27
ASN 03799235	1.27
ASN 04482209	1.27
ASN 05074731	1.27
ASN 05112629	1.27
ASN 05298364	1.27
ASN 05824418	1.27
ASN 05940257	1.27
ASN 06236478	1.27
ASN 06589356	1.27
ASN 07153547	1.27
ASN 07882772	1.27
ASN 09069390	1.27
FLUPROSTENOL	1.27
T5605463	1.27
T5606751	1.27
T5613622	1.27
T5617287	1.27
T5624797	1.27
T5635119	1.27
T5639516	1.27
T5648394	1.27
T5720273	1.27
T5724283	1.27
T5828401	1.27
ASN 03273321	1.26
ASN 03930016	1.26
ASN 04193774	1.26
ASN 04395043	1.26
ASN 04481078	1.26
ASN 04886838	1.26
ASN 05087817	1.26
ASN 05651635	1.26
ASN 05668058	1.26
ASN 06264468	1.26
ASN 06459869	1.26
ASN 06571289	1.26
ASN 06579153	1.26
ASN 06978062	1.26
T5571537	1.26
T5604323	1.26
T5610011	1.26
T5612269	1.26
T5619954	1.26
T5626869	1.26
T5686353	1.26
ASN 02993197	1.25
ASN 03069599	1.25
ASN 03575427	1.25
ASN 05544666	1.25
ASN 05923316	1.25
ASN 05969351	1.25
ASN 06533275	1.25
ASN 06593939	1.25
ASN 06914406	1.25
ASN 07114422	1.25
ASN 07116442	1.25
ASN 07153702	1.25
ASN 07153799	1.25
ASN 07468365	1.25
ASN 08744831	1.25
ASN 09114543	1.25
ASN 09859324	1.25
METHYLANABASINE	1.25
T5570079	1.25
T5576995	1.25
T5581731	1.25
T5600438	1.25
T5600581	1.25
T5600862	1.25
T5608059	1.25
T5638310	1.25
T5651413	1.25
T5678606	1.25
T5681587	1.25
T5696347	1.25
T5696953	1.25
5-HYDROXY-L-TRYPTOPHAN	1.24
ASN 04890328	1.24
ASN 05044622	1.24
ASN 05110936	1.24
ASN 05548042	1.24
ASN 05667315	1.24
ASN 05988717	1.24
ASN 06356716	1.24
ASN 06365508	1.24
ASN 06465565	1.24
ASN 06481710	1.24
ASN 06547644	1.24
ASN 06547661	1.24
ASN 06601461	1.24
ASN 06865827	1.24
ASN 06914313	1.24
ASN 07101292	1.24
ASN 07111303	1.24
ASN 08250563	1.24
ASN 08822177	1.24
ASN 08909637	1.24
ASN 08910447	1.24
T5604567	1.24
T5646485	1.24
T5650686	1.24
T5687075	1.24
T5697540	1.24
4-HYDROXY-3-METHOXY-PHENYLACETIC ACID	1.23
ASN 02170677	1.23
ASN 02538277	1.23
ASN 03108483	1.23
ASN 03366994	1.23
ASN 04369040	1.23
ASN 04457860	1.23
ASN 04497579	1.23
ASN 05545874	1.23
ASN 05547610	1.23
ASN 05555903	1.23
ASN 05587328	1.23
ASN 05668267	1.23
ASN 05804213	1.23
ASN 05917590	1.23
ASN 05942095	1.23
ASN 05988763	1.23
ASN 06016642	1.23
ASN 06579416	1.23
ASN 06942619	1.23
ASN 07187926	1.23
ASN 08778649	1.23
ASN 08910036	1.23
ASN 09123684	1.23
PROSTAGLANDIN E2	1.23
T5585650	1.23
T5598461	1.23
T5607726	1.23
T5623460	1.23
T5644426	1.23
T5655400	1.23
T5690653	1.23
T5696345	1.23
ASN 02254749	1.22
ASN 03365226	1.22
ASN 04458635	1.22
ASN 05103363	1.22
ASN 05106343	1.22
ASN 05110626	1.22
ASN 05114188	1.22
ASN 05115160	1.22
ASN 05452667	1.22
ASN 05543533	1.22
ASN 05670738	1.22
ASN 05915379	1.22
ASN 05988136	1.22
ASN 06367392	1.22
ASN 06402142	1.22
ASN 06445503	1.22
ASN 06482810	1.22
ASN 06567568	1.22
ASN 06866353	1.22
ASN 06978314	1.22
ASN 07832159	1.22
ASN 09114460	1.22
ASN 09646908	1.22
ASN 09858701	1.22
N'-NITROSONORNICOTINE	1.22
T5588151	1.22
T5591771	1.22
T5608057	1.22
T5609959	1.22
T5610019	1.22
T5645599	1.22
T5646915	1.22
T5659855	1.22
T5661437	1.22
T5667263	1.22
[truncated: 15,179 more rows]
