# Supplementary material for: Small Molecule Screening with Laser Cytometry Can Be Used to Identify Pro-Survival Molecules in Human Embryonic Stem Cells
Source: PLoS One. 2013 Jan 29;8(1):e54948. doi: 10.1371/journal.pone.0054948 (PMC3558484; doi:10.1371/journal.pone.0054948)
Supplement: Table S3 — Normalized Z scores for Calcein AM based hESC survival screen (unfiltered results). (XLS) [file pone.0054948.s003.xls]

## Sheet: unfiltered
Supplementary Table 3: Normalized z scores for Calcein based hESC survival screen (unfiltered).
Molecule Name	Z score
T6140247	14.7
5228409	12.8
ASN 02170664	12.7
5650155	12.3
ASN 05546205	12.3
AST 5545862	12.1
AST 5588997	12.1
AST 5588014	11.5
ASN 05588013	11.1
T5690541	10.5
AST 5545865	10.4
MS-200255	10.2
5301406	9.65
5796173	9.5
5241816	9.27
AST 5545863	9.18
T5590025	8.93
5608644	8.86
ASN 08253328	8.7
AST 5588582	8.61
MS-1503322	8.57
ASN 05588152	8.44
ASN 05543943	8.38
5521731	8.33
ASN 06016910	8.15
ASN 05546064	8.1
T5927591	8.09
ASN 03273369	8.07
ASN 04421416	7.72
T5573084	7.71
ASN 01213273	7.61
5562740	7.54
5783960	7.52
5576020	7.49
ASN 03019199	7.48
T6068890	7.44
AST 5587906	7.42
ASN 06532307	7.37
5654182	7.28
5671362	7.24
5677114	7.22
ASN 03437776	7.12
Apomorphine hydrochloride hemihydrate	7.11
T5627983	7.02
ASN 03793460	6.98
ASN 05397043	6.96
ASN 06744119	6.96
Perphenazine	6.96	0.198
T6086790	6.95
ASN 04187894	6.94
ASN 05544774	6.93
ASN 04186389	6.92
ASN 06978288	6.89
ASN 05383309	6.87
ASN 05397136	6.86
AST 5587905	6.82
T5629428	6.77
5618626	6.71
5522390	6.66
ASN 06978291	6.66
5458133	6.65
ASN 05543828	6.57
T5633667	6.57
ASN 05448546	6.56
5706476	6.54
T5627102	6.54
ASN 05937351	6.53
5356434	6.5
5737631	6.49
ASN 03819273	6.49
ASN 03437724	6.47
T5693323	6.47
ASN 02750734	6.45
5628681	6.41
ASN 05989534	6.4
ASN 05397535	6.38
ASN 07275060	6.35
5647801	6.32
5455477	6.28
ASN 05397450	6.28
T6069432	6.27
ASN 04373662	6.26
ASN 05943735	6.26
5539894	6.23
ASN 04755883	6.2
ASN 04043580	6.18
ASN 03578478	6.16
5933465	6.14
SYN 18382541	6.14
5673565	6.13
Oxymetazoline hydrochloride	6.13	1.45
ASN 03156047	6.1
T5632542	6.1
5348566	6.07
ASN 04186383	6.07
5344217	6.06
ASN 01906930	6.06
ASN 04458935	6.05
MS-300538	6.05
T5818410	6.05
ASN 02790011	6.04
ASN 05546059	6.04
5668154	6.02
5406363	5.98
5689182	5.98
MS-1504207	5.98
T5726513	5.93
ASN 04371323	5.92
ASN 08737568	5.92
5809079	5.91
T5627104	5.9
ASN 06978290	5.88
ASN 03019219	5.85
5574780	5.84
5531791	5.83
ASN 05556117	5.83
ASN 00911133	5.82
ASN 05261575	5.82
5467177	5.8
6433129	5.77
ASN 06538182	5.77
T5662515	5.75
5366398	5.74
5740200	5.71
ASN 04888941	5.71
5255397	5.7
ASN 03271413	5.7
ASN 04419976	5.7
ASN 06533957	5.7
5153116	5.69
5646858	5.68
5131367	5.65
T5646978	5.65
T5621309	5.64
5305843	5.63
5789193	5.6
5576593	5.59
5628345	5.59
ASN 04887358	5.59
5491798	5.58
ASN 03437481	5.57
ASN 01916169	5.54
5551668	5.53
MS-100698	5.53
5663088	5.51
AST 6538114	5.51
5563445	5.5
ASN 05923401	5.5
ASN 03365471	5.49
5344998	5.48
5657192	5.48
AST 6978269	5.48
5363294	5.45
5784227	5.43
MS-1502245	5.43
ASN 05545618	5.41
ASN 02137435	5.4
5351505	5.39
5413819	5.39
5458486	5.39
5526212	5.39
5379609	5.37
SYN 12227056	5.37
ASN 05545426	5.36
T5828441	5.36
5238276	5.35
ASN 05588740	5.35
5655305	5.34
5872522	5.34
ASN 07441502	5.34
HA-1077	5.34
5684820	5.33
5930487	5.33
ASN 04457860	5.33
T5659083	5.33
T5950497	5.33
5322997	5.31
5457669	5.31
MS-1504119	5.3
5322814	5.28
MS-1504105	5.28
5553789	5.26
5133311	5.25
5633207	5.25
5629294	5.24
5884947	5.23
5567563	5.22
5637419	5.22
5789523	5.22
ASN 00867619	5.21
5115726	5.2
5404251	5.2
ASN 05397320	5.2
5325838	5.19
5477591	5.19
5935510	5.19
5216151	5.18
ASN 05589018	5.17
MS-1500450	5.17
5350618	5.16
5655215	5.16
ASN 02325316	5.15
ASN 04458771	5.15
5157388	5.14
5637047	5.14
5813152	5.13
T5595139	5.12
5357507	5.11
5266596	5.1
5879556	5.1
5303898	5.09
5347158	5.09
ASN 02255425	5.09
ASN 04449990	5.09
5756039	5.08
ASN 08737170	5.08
5311238	5.06
ASN 05396991	5.06
T5688876	5.06
5306027	5.05
5834530	5.05
5842056	5.05
6585356	5.05
Myricetin	5.05
T5996542	5.05
ASN 02070549	5.04
ASN 05211784	5.03
Pirlindole mesylate	5.03
5561222	5.02
T5683799	5.01
5564662	5
5683959	4.99
5354425	4.98
5584539	4.98
ASN 03578929	4.97
MS-1500247	4.97
5470213	4.96
5162860	4.95
ASN 04455841	4.94
MS-200010	4.94
AEM 10039094	4.93
ASN 04392512	4.93
5132411	4.92
5804589	4.92
5105189	4.91
ASN 05987977	4.91
5108489	4.9
5629220	4.9
5174308	4.89
ASN 05397055	4.89
ASN 07276131	4.89
5128682	4.88
5680311	4.88
5182862	4.87
AST 07273637	4.87
AST 5588016	4.86
T5820404	4.86
ASN 08270370	4.84
Trimeprazine tartrate	4.84
5344748	4.83
AST 07273543	4.83
5311630	4.81
5609957	4.81
5662128	4.81
T5593064	4.81
5690434	4.8
ASN 03929498	4.8
ASN 05397022	4.8
T5647908	4.8
5144829	4.79
5148821	4.79
5310248	4.79
5101249	4.77
ASN 01516642	4.77
Promazine hydrochloride	4.77	1.03
T5637778	4.77
D-cycloserine	4.76
5340276	4.75
5453378	4.75
T5603380	4.75
ASN 04053087	4.74
5553725	4.72
ASN 08737168	4.71
Moricizine hydrochloride	4.71
T6042072	4.71
5784082	4.7
T5662586	4.7
5685756	4.69
5764790	4.69
5918448	4.69
5270135	4.68
Ethoxyquin	4.68	4.32
AST 06139569	4.68
5421790	4.66
5466643	4.66
5467835	4.66
5571310	4.66
T5649609	4.66
5345113	4.65
T5638057	4.65
T5931975	4.65
5534910	4.64
5653685	4.63
5667306	4.63
AST 6411527	4.63
5219662	4.62
ASN 04052069	4.62
ASN 05338762	4.62
T5570638	4.62
5617699	4.61
Hycanthone	4.61	0.51
5361489	4.6
5705565	4.6
ASN 05384780	4.6
5557561	4.59
MS-1503994	4.59
5191873	4.58
5663543	4.57
5406444	4.56
5475833	4.56
5624462	4.56
AST 07275059	4.56
AST 6534842	4.56
5243662	4.55
ASN 07112205	4.55
Resveratrol	4.55	0.354	2.33
5219645	4.54
5545055	4.54
5667625	4.54
5788145	4.53
5806184	4.53
ASN 05545656	4.52
ASN 08734166	4.52
5255028	4.51
5416967	4.51
5470447	4.51
5765026	4.51
5260983	4.5
5277327	4.5
5481062	4.5
ASN 05397220	4.5
AST 6978268	4.5
T5936883	4.5
5522554	4.49
5271186	4.48
ASN 08737944	4.48
MS-201448	4.48
T5675819	4.48
5379991	4.47
5423220	4.47
5467449	4.47
5468247	4.47
5542582	4.47
ASN 04393442	4.47
ASN 04482292	4.47
5747883	4.46
ASN 03271041	4.46
ASN 08735438	4.46
T5601951	4.46
T5997648	4.46
5357436	4.45
ASN 03271131	4.45
ASN 06236101	4.45
5302699	4.44
5323944	4.44
5768355	4.44
AST 6578262	4.44
MS-240429	4.44
5359380	4.43
5117192	4.42
5161160	4.42
5312642	4.42
5782206	4.42
AST 6570779	4.42
5275486	4.41
5614027	4.41
5705624	4.41
ASN 05397550	4.41
5344015	4.4
MS-300554	4.4
5467774	4.39
MS-1503212	4.39
5377376	4.38
5571824	4.38
ASN 08737570	4.38
5467649	4.37
5454176	4.35
5685710	4.35
ASN 03654385	4.35
5192038	4.34
5311677	4.34
5478544	4.34
T5853630	4.34
AST 6866213	4.33
MS-100682	4.33
T5726252	4.33
5133317	4.32
5240447	4.32
5373674	4.32
5632728	4.32
6586759	4.32
T5630427	4.32
T5632549	4.32
T5677451	4.32
5341759	4.31
5363621	4.31
5677951	4.31
ASN 03067889	4.31
ASN 02137447	4.3
T5597864	4.3
Tetrahydroalstonine	4.3
MS-330005	4.29
5281556	4.28
T6006307	4.28
5141678	4.27
5326552	4.27
5457858	4.26
5858665	4.26
T5583695	4.26
5356886	4.25
5648135	4.25
ASN 08223748	4.25
Dobutamine hydrochloride	4.25
5255404	4.24
5377465	4.24
5671535	4.24
AST 7274576	4.24
SYN 15572190	4.24
SYN 17477032	4.24
5316964	4.23
5768652	4.23
5130502	4.21
5655352	4.21
5723320	4.21
MS-1501136	4.21
5120580	4.2
5406172	4.2
5753607	4.2
5105213	4.19
5625983	4.19
5764445	4.19
AST 6978279	4.19
Nicergoline	4.19	0.632
T5697363	4.19
5340235	4.18
ASN 07275376	4.18
ASN 08254590	4.18
5348710	4.16
5107767	4.15
5174826	4.15
5261866	4.15
5569297	4.15
5569924	4.15
5630864	4.15
Caffeic acid	4.15
5326508	4.14
5406534	4.14
5472283	4.14
5527556	4.14
5689223	4.13
5475103	4.12
5811289	4.12
MS-1505308	4.12
5258090	4.11
5534012	4.11
5695191	4.11
5884479	4.11
Harmalol hydrochloride dihydrate	4.11
T5616201	4.11
5524422	4.1
5685297	4.1
AST 6538168	4.1
T5626965	4.1
T5647694	4.1
T5933903	4.1
5249122	4.09
5271210	4.09
5573550	4.09
ASN 04371694	4.09
ASN 06917037	4.09
5303845	4.08
ASN 02325090	4.08
ASN 04360676	4.08
AST 07273479	4.08
Esculetin	4.08	3.12
5107165	4.07
AST 06744513	4.07
AST 5587907	4.07
AST 6896049	4.07
AST 6978281	4.07
5274795	4.05
5326092	4.04
5380155	4.04
5555205	4.04
5251157	4.03
5359360	4.03
5537402	4.03
AST 6146783	4.03
MS-201580	4.03
5323595	4.02
5702234	4.02
ASN 08735178	4.02
5321368	4.01
5326132	4.01
ASN 08736670	4.01
MS-1503206	4.01
MS-1504094	4.01
T5738002	4.01
5255408	4
5256625	4
5537517	4
5920779	4
ASN 02324343	4
ASN 05305219	4
AST 6539730	4
SYN 15572222	4
5189204	3.99
5202505	3.99
5350051	3.99
5623244	3.99
5806211	3.99
T5982025	3.99
5105179	3.98
5223737	3.98
5667961	3.98
ASN 06567346	3.98
T5580536	3.98
5659472	3.97
ASN 03323428	3.97
AST 6068061	3.97
MS-210505	3.97
Vitamin K2	3.97
5144279	3.96
5277610	3.96
5316572	3.96
5470862	3.96
MS-100749	3.96
MS-201315	3.96
T6002094	3.96
5675894	3.95
T6014652	3.95
AST 3579139	3.94
AST 6537566	3.94
T5644786	3.94
T5959893	3.94
5194820	3.93
5311649	3.93
5343977	3.93
5351609	3.93
5354349	3.93
5585668	3.93
5678696	3.93
5715586	3.93
MS-1500274	3.93
SYN 17217140	3.93
T5718922	3.93
5268610	3.92
5668851	3.92
T6016736	3.92
5629981	3.91
AEM 08966879	3.91
AEM 10039550	3.91
T5738024	3.91
5550951	3.9
ASN 05946193	3.9
5276399	3.89
5375462	3.89
5565941	3.89
AEM 10039908	3.89
MS-310039	3.89
5303118	3.88
5340237	3.88
ASN 06978261	3.88
5350115	3.87
5378671	3.87
ASN 03929495	3.87
ASN 05345695	3.87
AST 5938225	3.87
Isoetharine mesylate salt	3.87
T6126446	3.87
5214551	3.86
5271370	3.86
5368062	3.86
5373195	3.86
5749728	3.86
5844347	3.86
5423564	3.85
ASN 00851028	3.85
5130426	3.84
5321529	3.84
5564319	3.84
ASN 05544668	3.84
SYN 17217539	3.84
T5697998	3.84
AST 6897659	3.83
T5989277	3.83
5255658	3.82
5274837	3.82
5323932	3.82
ASN 07186620	3.82
AST 6537676	3.82
T5717616	3.82
T5805056	3.82
5102006	3.81
5194039	3.81
ASN 05073748	3.81
MS-200107	3.81
5624042	3.8
SYN 15622116	3.8
5262447	3.79
5360200	3.79
5360920	3.79
5390254	3.79
AEM 10039142	3.79
5194703	3.78
5213352	3.78
5265871	3.78
5401613	3.78
ASN 08736729	3.78
5194348	3.77
5566238	3.77
T5992242	3.77
5478949	3.76
AEM 11113545	3.76
ASN 08734430	3.76
AST 07276320	3.76
T5922998	3.76
5113729	3.75
5173660	3.75
5261511	3.75
5275737	3.75
5339094	3.75
ASN 08735116	3.75
5215438	3.74
5215573	3.74
5563764	3.74
ASN 03795518	3.74
T5949517	3.74
T5951382	3.74
T5977340	3.74
5283983	3.73
5340723	3.73
ASN 02137172	3.73
ASN 03795517	3.73
T5615838	3.73
T6075709	3.73
5213395	3.72
5528375	3.72
AST 6538190	3.72
MS-100612	3.72
T6002846	3.72
5105237	3.71
5266262	3.71
AEM 11113375	3.71
T5705291	3.71
5343926	3.7
AST 07108482	3.7
T6158413	3.7
5107769	3.69
5322776	3.69
5660579	3.69
5807470	3.69
5882637	3.69
AST 7274859	3.69
SYN 13852793	3.69
5264110	3.68
5338876	3.68
AEM 11113449	3.68
ASN 02618191	3.68
ASN 07110251	3.68
AEM 11113584	3.67
AEM 12437337	3.67
AST 6540625	3.67
MS-1500246	3.67
5209021	3.66
5213850	3.66
5304357	3.66
5770160	3.66
5978214	3.66
AEM 11104635	3.66
T5975591	3.66
ASN 01029727	3.65
(-)-Isoproterenol hydrochloride	3.65	0.787
ASN 02538277	3.65
5339890	3.64
5549116	3.64
5737045	3.64
AEM 10038853	3.64
AST 05653486	3.64
AST 7275800	3.64
AEM 10039675	3.63
5104469	3.62
5263673	3.62
5327715	3.62
5338055	3.62
5471362	3.62
ASN 08735350	3.62
AST 7274108	3.62
T5734719	3.62
T6070005	3.62
5174813	3.61
5257994	3.61
5303009	3.61
5322595	3.61
ASN 06752432	3.61
5468672	3.6
5655383	3.6
AEM 10367476	3.6
ASN 08221953	3.6
T5669602	3.6
T5975439	3.6
5257201	3.59
5320380	3.59
5546377	3.59
AEM 10038868	3.59
ASN 03578519	3.59
Probucol	3.59	2.77
T5592344	3.59
5213721	3.58
5789137	3.58
6463205	3.58
ASN 03801482	3.58
SYN 15026394	3.58
5115021	3.57
5271226	3.57
5323489	3.57
5340214	3.57
5452460	3.57
ASN 04454800	3.57
5256529	3.56
5275458	3.56
5471843	3.56
5477724	3.56
5527462	3.56
AEM 11104659	3.56
ASN 04394120	3.56
MS-310031	3.56
STAUROSPORINE	3.56
T5583294	3.56
T5670828	3.56
5193669	3.55
5559274	3.55
AEM 12453671	3.55
ASN 07087249	3.55
ASN 08737853	3.55
AST 07441603	3.55
MS-1504002	3.55
5161260	3.54
5268554	3.54
AEM 10039750	3.54
ASN 02538846	3.54
AST 3579166	3.54
AST 6537655	3.54
AST 6537670	3.54
SYN 15446633	3.54
5194468	3.53
5219661	3.53
5349894	3.53
5361670	3.53
5529681	3.53
6656995	3.53
ASN 06460492	3.53
ASN 08735776	3.53
Ciclopirox ethanolamine	3.53	4.54
5352467	3.52
5454571	3.52
5672815	3.52
ASN 03778389	3.52
ASN 04371795	3.52
T5646660	3.52
5356985	3.51
5467510	3.51
5545364	3.51
5571422	3.51
5664279	3.51
MS-200090	3.51
MS-300534	3.51
5148060	3.5
5185179	3.5
5310155	3.5
6366911	3.5
AEM 12502120	3.5
ASN 03367640	3.5
5102019	3.49
5243654	3.49
5251574	3.49
5425870	3.49
5575667	3.49
ASN 07276106	3.49
MS-1504257	3.49
SYN 15638588	3.49
T5672459	3.49
AST 6535797	3.48
AST 7273649	3.48
MS-1502209	3.48
5472360	3.47
5633522	3.47
AEM 10039743	3.47
AEM 11113505	3.47
ASN 04454799	3.47
ASN 04454817	3.47
5127645	3.46
5309423	3.46
5318411	3.46
5773310	3.46
6066501	3.46
T5705293	3.46
T6029691	3.46
5304633	3.45
5373712	3.45
5479270	3.45
5935999	3.45
ASN 07273825	3.45
AST 6538116	3.45
MS-100287	3.45
5113973	3.44
5268538	3.44
5453143	3.44
5458609	3.44
ASN 03579973	3.44
T5811122	3.44
T6110880	3.44
5120881	3.43
5411761	3.43
5491808	3.43
ASN 05386752	3.43
ASN 08734734	3.43
AST 6579279	3.43
5193812	3.42
5542014	3.42
AEM 11104646	3.42
AEM 12454533	3.42
T5704985	3.42
T6013322	3.42
T6149657	3.42
5277996	3.41
5320148	3.41
5421405	3.41
MS-100291	3.41
5113192	3.4
5115703	3.4
5339279	3.4
5379487	3.4
5473451	3.4
5574565	3.4
5666718	3.4
AST 6978169	3.4
T5871961	3.4
T5952093	3.4
T5962387	3.4
5249951	3.39
5255039	3.39
5406438	3.39
Moxisylyte hydrochoride	3.39
SYN 17217152	3.39
T5840433	3.39
5113426	3.38
5273018	3.38
5309557	3.38
5345482	3.38
5457379	3.38
5536483	3.38
5728179	3.38
AEM 11104673	3.38
T5757694	3.38
T5918271	3.38
5340221	3.37
5375100	3.37
5475743	3.37
ASN 03579647	3.37
ASN 06481420	3.37
Methotrimeprazine maleat salt	3.37
5226604	3.36
5280744	3.36
5379159	3.36
5666708	3.36
SYN 17740862	3.36
T6001588	3.36
5248878	3.35
5265134	3.35
ASN 05544943	3.35
Luteolin	3.35
T5941100	3.35
T5941204	3.35
5305849	3.34
5460902	3.34
5477872	3.34
5759875	3.34
ASN 09858701	3.34
MS-1500676	3.34
MS-1501113	3.34
SYN 12338740	3.34
T5982637	3.34
5189185	3.33
5194933	3.33
5234356	3.33
5258512	3.33
5546675	3.33
AEM 12454443	3.33
ASN 06353605	3.33
AST 07108567	3.33
T6155024	3.33
ASN 03200638	3.32
AST 6536857	3.32
AST 6744170	3.32
5522935	3.31
5541939	3.31
ASN 04053372	3.31
ASN 04428878	3.31
T5634983	3.31
T6025651	3.31
5420374	3.3
5522327	3.3
ASN 04752292	3.3
ASN 08735135	3.3
AST 5545201	3.3
MS-100687	3.3
T5673118	3.3
T5910133	3.3
T6093571	3.3
5104648	3.29
5355997	3.29
5715581	3.29
5755714	3.29
ASN 06978284	3.29
T6159148	3.29
SYN 17217306	3.28
5249090	3.27
5319630	3.27
5341752	3.27
5462261	3.27
5575331	3.27
5684782	3.27
5783999	3.27
6361876	3.27
AEM 12226975	3.27
ASN 03851194	3.27
ASN 04752859	3.27
AST 6538073	3.27
MS-100584	3.27
MS-300565	3.27
T5873879	3.27
5110943	3.26
5534169	3.26
AEM 10039439	3.26
ASN 04456304	3.26
AST 5804512	3.26
AST 6535745	3.26
5113675	3.25
5201720	3.25
5236763	3.25
5259984	3.25
5321284	3.25
5340604	3.25
ASN 04891341	3.25
T5866312	3.25
T5866728	3.25
5102003	3.24
5189211	3.24
5347523	3.24
5531025	3.24
5537748	3.24
5663245	3.24
5743043	3.24
5754122	3.24
6534490	3.24
ASN 05987984	3.24
ASN 06915064	3.24
T5680312	3.24
T5851339	3.24
Triflupromazine hydrochloride	3.24
5263179	3.23
5319059	3.23
5424919	3.23
5620468	3.23
6623787	3.23
T5594842	3.23
T5669607	3.23
T5699823	3.23
5153495	3.22
5153535	3.22
5340605	3.22
5549342	3.22
5678481	3.22
T5621308	3.22
5230617	3.21
5257776	3.21
5260093	3.21
5728425	3.21
ASN 05381671	3.21
AST 6384488	3.21
Benserazide hydrochloride	3.21	-0.0271
MS-200463	3.21
Salsolinol hydrobromide	3.21
T5654380	3.21
5135703	3.2
5355480	3.2
5454631	3.2
5528743	3.2
ASN 04186890	3.2
ASN 05108527	3.2
T6152428	3.2
5194370	3.19
5260186	3.19
5282556	3.19
5698656	3.19
T5833975	3.19
T5983655	3.19
T6149335	3.19
5251307	3.18
5272125	3.18
5303466	3.18
5754166	3.18
AST 7275517	3.18
T6012335	3.18
T6132426	3.18
5278448	3.17
5326095	3.17
ASN 02323956	3.17
ASN 05388481	3.17
AST 6866088	3.17
SYN 17927495	3.17
T5752807	3.17
T5778689	3.17
5113430	3.16
5115671	3.16
5154301	3.16
5311792	3.16
5320432	3.16
5667782	3.16
ASN 06420180	3.16
5100870	3.15
5148052	3.15
5175572	3.15
5214555	3.15
5304503	3.15
5425823	3.15
5477053	3.15
5485111	3.15
AST 6537332	3.15
Ellipticine	3.15
MS-270083	3.15
Promethazine hydrochloride	3.15	3.99
T5886828	3.15
T5940066	3.15
5114800	3.14
5194254	3.14
5200449	3.14
5234327	3.14
5316794	3.14
5810658	3.14
AEM 10367496	3.14
T5655400	3.14
5247372	3.13
5251333	3.13
5272509	3.13
5350852	3.13
5548759	3.13
ASN 05397060	3.13
ASN 08735040	3.13
AST 6537644	3.13
SYN 17217149	3.13
T5861368	3.13
T6095101	3.13
5100374	3.12
5109999	3.12
5237578	3.12
5269238	3.12
5341422	3.12
5797276	3.12
5967558	3.12
T5637643	3.12
T5876939	3.12
T5879309	3.12
5113916	3.11
5113960	3.11
5227864	3.11
5521684	3.11
ASN 07111303	3.11
T5591540	3.11
T5910135	3.11
5267402	3.1
5662365	3.1
T5807616	3.1
T6059417	3.1
T6076958	3.1
5186207	3.09
5306244	3.09
5362628	3.09
5928109	3.09
ASN 02538713	3.09
AST 6536480	3.09
T5663686	3.09
5110215	3.08
5113708	3.08
5319800	3.08
5717379	3.08
6606941	3.08
ASN 04393346	3.08
ASN 05262895	3.08
ASN 05346340	3.08
ASN 05932166	3.08
AST 5588497	3.08
MS-1502094	3.08
T5589754	3.08
T6124660	3.08
5186152	3.07
5474271	3.07
5483044	3.07
AEM 11104633	3.07
ASN 03367824	3.07
Equilin	3.07
5215012	3.06
5260802	3.06
5262233	3.06
5666996	3.06
ASN 05792255	3.06
AST 6118235	3.06
SYN 12436199	3.06
T5704311	3.06
5454585	3.05
5705169	3.05
5766483	3.05
6501029	3.05
AEM 11789473	3.05
ASN 03777403	3.05
ASN 04367069	3.05
AST 5098819	3.05
AST 5588279	3.05
T5861439	3.05
5107784	3.04
5232755	3.04
5261800	3.04
5473743	3.04
5728112	3.04
ASN 03580219	3.04
ASN 07439496	3.04
ASN 07881592	3.04
ASN 08753258	3.04
T5636365	3.04
T5777346	3.04
T5820936	3.04
T5974844	3.04
5104458	3.03
5175108	3.03
5260420	3.03
5317278	3.03
5478000	3.03
AEM 10038855	3.03
5301729	3.02
5305051	3.02
5549090	3.02
5623431	3.02
5784076	3.02
MS-1505345	3.02
5376618	3.01
5416008	3.01
SYN 16308621	3.01
Syrosingopine	3.01
T6020009	3.01
5115682	3
5257620	3
2-DHLA-PAF	3
AEM 11113384	3
ASN 04457508	3
MS-210397	3
T5632594	3
T6056185	3
5263814	2.99
5320064	2.99
5476568	2.99
ASN 03365218	2.99
AST 06571350	2.99
AST 06571460	2.99
Ethopropazine hydrochloride	2.99	4.16
SYN 15446629	2.99
5102477	2.98
5748544	2.98
5771560	2.98
5809671	2.98
5890505	2.98
ASN 02325161	2.98
ASN 04187316	2.98
AST 7273636	2.98
AST 7441623	2.98
T5699472	2.98
5169072	2.97
5201600	2.97
5379691	2.97
ASN 03156513	2.97
ASN 05099903	2.97
5322407	2.96
5561362	2.96
ASN 08735674	2.96
AST 5560616	2.96
Deferoxamine mesylate	2.96	1.17
MS-1501012	2.96
T5927043	2.96
T5993277	2.96
5117979	2.95
5193415	2.95
5229708	2.95
5655757	2.95
ASN 05989324	2.95
AST 5589086	2.95
SYN 17217360	2.95
SYN 17217403	2.95
T5648580	2.95
T5716987	2.95
T5777644	2.95
T6197266	2.95
Trolox	2.95
5105190	2.94
5115087	2.94
5257067	2.94
5277720	2.94
5367002	2.94
ASN 05544140	2.94
ASN 05545949	2.94
AST 4888786	2.94
AST 5545757	2.94
Propofol	2.94
T5762700	2.94
T5839805	2.94
T5877233	2.94
T6142095	2.94
5192211	2.93
5323289	2.93
5810881	2.93
ASN 07104484	2.93
AST 07100964	2.93
AST 5079264	2.93
5130923	2.92
5189221	2.92
5303988	2.92
5467403	2.92
5477593	2.92
5533207	2.92
ASN 03069651	2.92
ASN 04369984	2.92
ASN 05018605	2.92
T5587710	2.92
T5987028	2.92
T6068928	2.92
T6069490	2.92
T6155030	2.92
5302700	2.91
5705643	2.91
AEM 10038851	2.91
ASN 04192789	2.91
ASN 05111894	2.91
ASN 06977006	2.91
SYN 17217180	2.91
T5817038	2.91
T6107617	2.91
5176080	2.9
5194942	2.9
5214552	2.9
5281332	2.9
5341776	2.9
5528689	2.9
5539783	2.9
5562883	2.9
5735503	2.9
SYN 12969933	2.9
T5958565	2.9
5194403	2.89
5311328	2.89
5326139	2.89
5480648	2.89
5615432	2.89
ASN 04371697	2.89
AST 06601545	2.89
AST 6236555	2.89
T5636187	2.89
T5762960	2.89
5101992	2.88
5363466	2.88
5539968	2.88
5648039	2.88
6623658	2.88
AEM 11113387	2.88
ASN 05944904	2.88
ASN 06117523	2.88
AST 6013990	2.88
AST 6539840	2.88
T5866068	2.88
T5945277	2.88
T6079857	2.88
5255496	2.87
5320052	2.87
5321683	2.87
AEM 10324625	2.87
ASN 04456309	2.87
AST 6978272	2.87
SYN 12252289	2.87
T5717253	2.87
5154926	2.86
5236903	2.86
5349640	2.86
5737300	2.86
ASN 03364984	2.86
AST 06533203	2.86
AST 5923244	2.86
SYN 11264261	2.86
T5610011	2.86
T5949519	2.86
5107549	2.85
5193865	2.85
5217961	2.85
5453473	2.85
5466680	2.85
5538527	2.85
5584202	2.85
5614047	2.85
ASN 05448373	2.85
AST 6537226	2.85
T5719002	2.85
T5828360	2.85
T5850282	2.85
T6114427	2.85
5575792	2.84
5681370	2.84
ASN 03579755	2.84
ASN 04428995	2.84
ASN 07880561	2.84
ASN 09858718	2.84
AST 5345749	2.84
AST 6126574	2.84
AST 6978086	2.84
MS-1500759	2.84
MS-1502253	2.84
SAM001246965	2.84	0.873
ASN 04369519	2.84	0.0411
T5698260	2.84
T5918860	2.84
T5949522	2.84
5216833	2.83
5222097	2.83
5256864	2.83
5305466	2.83
5310000	2.83
5316307	2.83
5378440	2.83
5470681	2.83
5476695	2.83
5478151	2.83
5618842	2.83
5682065	2.83
AEM 10038871	2.83
AEM 12437197	2.83
AEM 12454432	2.83
ASN 05112498	2.83
AST 5557460	2.83
AST 6353248	2.83
MS-100162	2.83
MS-100605	2.83
T5610833	2.83
T5617565	2.83
5193023	2.82
5283196	2.82
5477828	2.82
5573225	2.82
5688466	2.82
5695926	2.82
ASN 08735775	2.82
AST 07108491	2.82
AST 07108511	2.82
AST 07108566	2.82
AST 6152677	2.82
AST 6536441	2.82
MS-201513	2.82
T5612878	2.82
5113007	2.81
5153184	2.81
5189187	2.81
5264760	2.81
5784279	2.81
ASN 04448075	2.81
AST 6015399	2.81
T5744751	2.81
T5826538	2.81
T5970344	2.81
T5971707	2.81
T5974850	2.81
5275301	2.8
5326153	2.8
5469039	2.8
5470793	2.8
5557901	2.8
5651249	2.8
ASN 02254648	2.8
AST 6978458	2.8
Levonordefrin	2.8
SYN 16308473	2.8
T5661330	2.8
T5848912	2.8
T5856266	2.8
5105183	2.79
5426006	2.79
5547136	2.79
5604038	2.79
6641022	2.79
ASN 01920106	2.79
SYN 12734250	2.79
SYN 16308793	2.79
T5721280	2.79
T6002081	2.79
T6108659	2.79
T6151557	2.79
5113961	2.78
5250046	2.78
5280763	2.78
5305930	2.78
5668688	2.78
6500824	2.78
ASN 03367439	2.78
ASN 06581909	2.78
AST 6537641	2.78
AST 6552783	2.78
SYN 17475895	2.78
T5836697	2.78
5121652	2.77
5123302	2.77
5216191	2.77
5238958	2.77
5314843	2.77
AEM 11104636	2.77
ASN 06582772	2.77
Beta-Escin	2.77	1.43
T5840580	2.77
T6116468	2.77
5373578	2.76
5375554	2.76
5379403	2.76
ASN 01213346	2.76
MS-1500112	2.76
T5882221	2.76
5228443	2.75
5488067	2.75
AEM 10038835	2.75
AST 5081546	2.75
AST 6016978	2.75
Eicosa-11Z,14Z-dienoyl ethanolamide	2.75
T6058159	2.75
(S)-(-)-Cycloserine	2.74	1.7	-0.0231	0.354
5123490	2.74
5130941	2.74
5214554	2.74
5285729	2.74
5315095	2.74
5318293	2.74
5474584	2.74
5540639	2.74
ASN 03017633	2.74
ASN 04892906	2.74
ASN 09586442	2.74
AST 3437785	2.74
SYN 15730792	2.74
T5783027	2.74
T5793176	2.74
T5800203	2.74
T6003484	2.74
T6100157	2.74
T6154182	2.74
5193167	2.73
5318015	2.73
5326673	2.73
5460434	2.73
6069395	2.73
ASN 05304742	2.73
ASN 05345949	2.73
ASN 06744912	2.73
MS-1500572	2.73
T5646681	2.73
T5973973	2.73
T6023429	2.73
T6118907	2.73
5115551	2.72
5403375	2.72
5469824	2.72
5523766	2.72
5758239	2.72
6497060	2.72
6626011	2.72
AEM 12436523	2.72
AST 05674338	2.72
AST 5936183	2.72
T5730613	2.72
T5990349	2.72
T6129090	2.72
T6145674	2.72
5230822	2.71
5350347	2.71
5458901	2.71
5467830	2.71
ASN 02255431	2.71
ASN 06978017	2.71
T5847322	2.71
T5876878	2.71
5531913	2.7
ASN 06224618	2.7
ASN 06580097	2.7
T5899851	2.7
5194326	2.69
5321906	2.69
AEM 11113299	2.69
ASN 03799002	2.69
ASN 05346463	2.69
T5861244	2.69
T5906102	2.69
T5949498	2.69
T6053417	2.69
T6147840	2.69
5140720	2.68
5453372	2.68
ASN 05305027	2.68
ASN 05380064	2.68
ASN 07274795	2.68
AST 06571401	2.68
AST 5943609	2.68
AST 6235155	2.68
AST 6533860	2.68
AST 6538115	2.68
AST 6744007	2.68
AST 6744556	2.68
T5646039	2.68
T5668966	2.68
T5824177	2.68
5100402	2.67
5527548	2.67
5545160	2.67
5647129	2.67
5684393	2.67
6367288	2.67
AEM 09531563	2.67
ASN 03580221	2.67
ASN 05108137	2.67
AST 5588401	2.67
AST 5804766	2.67
AST 6573427	2.67
AST 6895800	2.67
T5572657	2.67
T5616480	2.67
5209023	2.66
5255120	2.66
5255407	2.66
5316691	2.66
5318869	2.66
5320106	2.66
5320464	2.66
5324480	2.66
5479268	2.66
5758142	2.66
5766008	2.66
5774054	2.66
6633889	2.66
AEM 12453950	2.66
AST 5988987	2.66
AST 6540291	2.66
AST 7110644	2.66
T5882653	2.66
T5894038	2.66
5194930	2.65
5538529	2.65
5710301	2.65
6623436	2.65
ASN 03364960	2.65
ASN 03433743	2.65
ASN 05682285	2.65
ASN 08896071	2.65
AST 06978303	2.65
5215548	2.64
5280696	2.64
5303146	2.64
5326601	2.64
5489932	2.64
5546844	2.64
5567915	2.64
ASN 04480656	2.64
ASN 05988182	2.64
AST 6118218	2.64
AST 6601014	2.64
SAM001247023	2.64	1.91
T5627101	2.64
T5811124	2.64
T5904162	2.64
T6088360	2.64
5258596	2.63
5262055	2.63
5279541	2.63
5302043	2.63
5473470	2.63
5493201	2.63
5561911	2.63
ASN 04481077	2.63
ASN 05108586	2.63
ASN 05340595	2.63
AST 6360872	2.63
MS-1504101	2.63
T5768222	2.63
T5981981	2.63
5107943	2.62
5118749	2.62
5148081	2.62
5471407	2.62
5538502	2.62
5823090	2.62
AEM 10038844	2.62
ASN 04392945	2.62
ASN 05211513	2.62
ASN 06940909	2.62
MS-100588	2.62
T5781398	2.62
T5784662	2.62
T5816340	2.62
T6013887	2.62
T6030705	2.62
T6060532	2.62
T6134559	2.62
T6148179	2.62
T6151305	2.62
5113955	2.61
5201830	2.61
5709199	2.61
5753466	2.61
5766539	2.61
ASN 03160710	2.61
ASN 03791871	2.61
AST 07274064	2.61
AST 6361600	2.61
T5571033	2.61
T5918067	2.61
T6006236	2.61
T6026396	2.61
T6041676	2.61
5189208	2.6
5255053	2.6
5279683	2.6
5427357	2.6
5572154	2.6
AEM 10038876	2.6
ASN 01920046	2.6
ASN 05111608	2.6
ASN 06554273	2.6
ASN 06956278	2.6
AST 5544221	2.6
AST 7274669	2.6
MS-201606	2.6
SYN 17217191	2.6
T5795091	2.6
T5840579	2.6
T6110407	2.6
5217830	2.59
5308469	2.59
5363633	2.59
5404493	2.59
5404557	2.59
5751857	2.59
AEM 10039634	2.59
SYN 15639456	2.59
T5928643	2.59
T6146209	2.59
WORTMANNIN	2.59
5224466	2.58
5282402	2.58
5625017	2.58
5672305	2.58
ASN 04050311	2.58
ASN 05345833	2.58
AST 5588583	2.58
AST 6014373	2.58
C8 CERAMINE	2.58
Nitrarine dihydrochloride	2.58
5340267	2.57
5618505	2.57
5706770	2.57
5708207	2.57
5784020	2.57
ASN 04481599	2.57
ASN 05106512	2.57
ASN 05346161	2.57
ASN 06978265	2.57
T5848881	2.57
T6060694	2.57
T6067595	2.57
T6104792	2.57
5158512	2.56
5180653	2.56
5186235	2.56
5186271	2.56
5189222	2.56
5197025	2.56
5257149	2.56
5326961	2.56
5523887	2.56
5971483	2.56
AEM 10038867	2.56
AEM 10039110	2.56
ASN 04193530	2.56
ASN 06579278	2.56
AST 7274483	2.56
5326197	2.55
5366690	2.55
5401612	2.55
5414366	2.55
5530237	2.55
5570037	2.55
5649529	2.55
AEM 10039560	2.55
ASN 05044592	2.55
ASN 05256461	2.55
ASN 06914642	2.55
AST 5552081	2.55
AST 6016346	2.55
MS-201581	2.55
T5615886	2.55
T5697534	2.55
T5953134	2.55
T5964765	2.55
T6078307	2.55
5226637	2.54
5306454	2.54
5307922	2.54
5326439	2.54
5338939	2.54
5469547	2.54
5559639	2.54
5604662	2.54
6395142	2.54
ASN 03272599	2.54
ASN 04192512	2.54
ASN 05376926	2.54
ASN 05459126	2.54
AST 7275423	2.54
T5840569	2.54
T6106152	2.54
T6126670	2.54
5117321	2.53
5118789	2.53
5193905	2.53
5248983	2.53
5301163	2.53
ASN 06014848	2.53
AST 6118580	2.53
Proscillaridin A	2.53
T5664928	2.53
T5674267	2.53
T5692469	2.53
T5839458	2.53
T6030168	2.53
5201668	2.52
5230821	2.52
5232714	2.52
5301062	2.52
5302778	2.52
5326137	2.52
5377693	2.52
5552375	2.52
5554454	2.52
5561769	2.52
5784085	2.52
5925802	2.52
6623993	2.52
ASN 04190946	2.52
ASN 05551760	2.52
ASN 05673408	2.52
ASN 09858446	2.52
AST 6536068	2.52
AST 6538089	2.52
AST 6978672	2.52
MS-1501205	2.52
MS-1504041	2.52
T5589300	2.52
T5589362	2.52
T5590792	2.52
T6122428	2.52
5272683	2.51
5469487	2.51
6061020	2.51
ASN 02137176	2.51
ASN 03069786	2.51
ASN 04192597	2.51
ASN 05378782	2.51
ASN 06357355	2.51
ASN 06533227	2.51
AST 5552670	2.51
AST 6018126	2.51
AST 6866144	2.51
SYN 09842391	2.51
T5707660	2.51
T5741690	2.51
T5792284	2.51
T5903650	2.51
T6128220	2.51
5113025	2.5
5203855	2.5
6630545	2.5
AEM 08966869	2.5
AEM 12230647	2.5
ASN 02834190	2.5
ASN 03019204	2.5
ASN 05544848	2.5
ASN 05932192	2.5
ASN 06118490	2.5
ASN 08735530	2.5
ASN 08736967	2.5
ASN 08737943	2.5
AST 07274628	2.5
AST 6015389	2.5
T5591951	2.5
T5691490	2.5
T5949492	2.5
5187070	2.49
5321896	2.49
5625917	2.49
5803990	2.49
ASN 05108188	2.49
ASN 05304740	2.49
ASN 05836031	2.49
Menadione	2.49
MS-1505268	2.49	-0.0545
T5636169	2.49
T5845600	2.49
T6030628	2.49
T6142815	2.49
5219796	2.48
5467989	2.48
5591010	2.48
6601480	2.48
AEM 10039730	2.48
ASN 03431580	2.48
ASN 04370118	2.48
ASN 05969691	2.48
AST 5552684	2.48
AST 5554327	2.48
AST 6538153	2.48
AST 6540594	2.48
T5801051	2.48
T5833518	2.48
T5849020	2.48
T5878461	2.48
T5968280	2.48
T5987291	2.48
T6074286	2.48
5187269	2.47
5241417	2.47
5310024	2.47
6190728	2.47
6437373	2.47
6539281	2.47
AEM 09719810	2.47
ASN 04392891	2.47
ASN 04888726	2.47
ASN 06918802	2.47
AST 6570770	2.47
T5644173	2.47
T5749713	2.47
5194467	2.46
5202228	2.46
5258415	2.46
5452783	2.46
5573003	2.46
5683121	2.46
ASN 02137496	2.46
ASN 04191537	2.46
ASN 04392503	2.46
ASN 06583883	2.46
AST 6117479	2.46
Strophanthidin	2.46
SYN 15610420	2.46
T5637988	2.46
T5670602	2.46
T5833783	2.46
T5962395	2.46
T5980455	2.46
T6048822	2.46
T6075719	2.46
5316410	2.45
5628108	2.45
5701399	2.45
5705462	2.45
5763421	2.45
ASN 08250125	2.45
AST 06351324	2.45
AST 06744459	2.45
AST 06744462	2.45
AST 5944740	2.45
AST 6121771	2.45
T5664838	2.45
T5710062	2.45
T5723142	2.45
T5812168	2.45
T5823707	2.45
T5933945	2.45
T5939287	2.45
T5972251	2.45
T6114365	2.45
5201735	2.44
5306365	2.44
5374712	2.44
5452512	2.44
6272022	2.44
ASN 03206706	2.44
ASN 03573153	2.44
ASN 05303738	2.44	-0.827
ASN 05988001	2.44
ASN 08735216	2.44
AST 06601097	2.44
AST 06744338	2.44
AST 5116464	2.44
AST 6584398	2.44
SYN 15446631	2.44
SYN 17295145	2.44
T5866817	2.44
5241161	2.43
5376324	2.43
5410827	2.43
5472790	2.43
5749056	2.43
5769615	2.43
ASN 03578917	2.43
ASN 03798401	2.43
ASN 03801490	2.43
ASN 05300622	2.43
AST 5589057	2.43
SAM001246524	2.43
SYN 15567782	2.43
SYN 17217341	2.43
T5635940	2.43
T6030165	2.43
T6030180	2.43
T6131568	2.43
T6141563	2.43
5541564	2.42
5568679	2.42
5570943	2.42
5572120	2.42
ASN 03273424	2.42
ASN 05102508	2.42
ASN 05938390	2.42
ASN 08969408	2.42
AST 06018098	2.42
T5637926	2.42
T5670084	2.42
T5671549	2.42
T5762930	2.42
T5902420	2.42
T5931124	2.42
5113625	2.41
5285492	2.41
5301967	2.41
5345868	2.41
5549014	2.41
5690795	2.41
5880254	2.41
AEM 11104737	2.41
ASN 05558107	2.41
AST 04360775	2.41
AST 5588192	2.41
AST 6357399	2.41
AST 6361589	2.41
AST 6535842	2.41
Digitoxigenin	2.41
Phentolamine hydrochloride	2.41	-0.385
SYN 15649554	2.41
SYN 16307784	2.41
T5625770	2.41
5201842	2.4
5222790	2.4
5248164	2.4
5353866	2.4
5529982	2.4
6068727	2.4
AEM 10038918	2.4
AEM 10039164	2.4
ASN 03160504	2.4
ASN 03436765	2.4
ASN 07048986	2.4
AST 6014759	2.4
AST 6570781	2.4
SAM001246716	2.4	0.732
T5950244	2.4
T6030134	2.4
T6128134	2.4
T6128642	2.4
5194136	2.39
5489355	2.39
ASN 03368158	2.39
ASN 04480868	2.39
ASN 04482308	2.39
ASN 08222201	2.39
AST 3777147	2.39
AST 6121871	2.39
MS-201595	2.39
T5871897	2.39
5175180	2.38
5175762	2.38
[truncated: 63,536 more rows]
