# Supplementary material for: Small Molecule Screening with Laser Cytometry Can Be Used to Identify Pro-Survival Molecules in Human Embryonic Stem Cells
Source: PLoS One. 2013 Jan 29;8(1):e54948. doi: 10.1371/journal.pone.0054948 (PMC3558484; doi:10.1371/journal.pone.0054948)
Supplement: Table S4 — Normalized Z scores for Calcein AM based hESC survival screen (perimeter filtered results). (XLS) [file pone.0054948.s004.xls]

## Sheet: Perimeter filtered
Supplementary Table 4: Normalized z scores for Calcein based hESC survival screen (perimeter filtered).
Molecule Name	Z score
T5927591	10.1
T5597864	9.06
T6140247	7.82
AST 5588997	7.56
AEM 10367476	7.41
5650155	7.36
AST 5588014	7.18
5521731	6.98
T5952093	6.92
MS-1500274	6.88
5356434	6.66
AEM 10367496	6.65
MS-100687	6.6
T6042072	6.34
5301406	5.92
5348017	5.86
T5571033	5.65
T5820404	5.56
MS-1503994	5.55
5681370	5.4
HA-1077	5.29
MS-1501205	5.27
MS-100291	5.18
T5942234	5.11
MS-1503322	4.95
T5964965	4.91
ASN 04187316	4.86
MS-200255	4.86
T5638057	4.77
Digoxin	4.71
T5973973	4.69
5806184	4.68
T5637778	4.65
5216151	4.58
Strophantine octahydrate	4.57
MS-100698	4.55
MS-1501136	4.52
5238276	4.45
Digitoxigenin	4.42
ASN 06917037	4.39
Proscillaridin A	4.39
AST 6535797	4.34
MS-1500986	4.32
5539968	4.28
T5861368	4.28
T5738024	4.27
5657508	4.26
AEM 10820141	4.26
5413819	4.23
ASN 04371694	4.23
2-DHLA-PAF	4.22
T5705293	4.21
ASN 04421416	4.2
ASN 06018167	4.2
Strophanthidin	4.2
T5998472	4.2
5281556	4.19
5159216	4.16
5174813	4.16
MS-100584	4.15
T5738002	4.15
5466982	4.14
5916127	4.13
5650569	4.11
5219662	4.09
ASN 04392945	4.09
ASN 05932166	4.09
AST 7274108	4.09
AST 6538168	4.08
MS-100162	4.08
T6062916	4.08
ASN 05915774	4.06
T5845600	4.06
MS-1500676	4.04
ASN 05987984	4.03
T6014652	4.03
5423220	4.02
T6005655	4.01
6395142	4
5222097	3.98
T6103934	3.98
AEM 10039094	3.97
ASN 03272752	3.97
ASN 05937351	3.97
SYN 12338740	3.97
T6147840	3.97
T6025823	3.96
5270030	3.95
T5666042	3.93
T5950244	3.93
5480210	3.91
ASN 04456028	3.91
T5735431	3.9
ASN 05106512	3.89
5623906	3.87
5682065	3.86
Lanatoside C	3.84
MS-1500247	3.84
ASN 04193530	3.83
AST 06953295	3.83
ASN 06117523	3.82
AST 6866213	3.82
T5982025	3.82
5668154	3.81
5563445	3.8
5325838	3.79
T6013322	3.78
T5811122	3.77
T5692442	3.76
5355997	3.75
T5904780	3.74
ASN 03367640	3.73
5406446	3.72
6651022	3.72
AST 07102868	3.72
SYN 16385724	3.72
5350115	3.71
5670766	3.71
ASN 03795517	3.71
ASN 05108188	3.71
Pirlindole mesylate	3.7
T5840433	3.69
5460902	3.68
5722114	3.68
ASN 03200638	3.68
SYN 12252289	3.68
5320473	3.67
AEM 10367495	3.67
T5974844	3.67
T6070005	3.67
6624529	3.66
T6155030	3.66
5538529	3.65
ASN 05682285	3.64
T6108659	3.64
5309423	3.63
6046765	3.63
ASN 05545061	3.63
5216695	3.62
5285842	3.62
ASN 05988001	3.62
AST 5944128	3.62
6534490	3.61
AST 7113745	3.61
5654182	3.6
ASN 05262895	3.6
5425974	3.59
ASN 04888773	3.58
AST 6584398	3.57
T5936883	3.57
5421790	3.56
5489355	3.56
AST 6744170	3.56
T5671549	3.56
T5939347	3.56
5452460	3.55
ASN 05299587	3.55
ASN 07441502	3.55
5107767	3.54
5252967	3.54
6061020	3.54
Dipivefrin hydrochloride	3.54
T6038309	3.54
T6114427	3.54
5243662	3.53
5262841	3.53
5677904	3.53
6585356	3.52
T5657818	3.52
T6067151	3.52
ASN 05378988	3.51
T5993277	3.51
5142106	3.5
ASN 05545126	3.5
ASN 06956278	3.5
AST 05945653	3.5
SYN 17736254	3.5
5113430	3.49
ASN 05943001	3.49
Helveticoside	3.49
ASN 05386752	3.48
T5583695	3.48
T6014163	3.48
5456550	3.47
T5988446	3.47
5192038	3.46
5240141	3.46
5404792	3.46
AST 07275059	3.46
5671362	3.45
5265688	3.44
ASN 06220945	3.44
AST 5116464	3.44
5189204	3.43
5201842	3.43
5809671	3.43
ASN 04190092	3.43
ASN 04371697	3.43
ASN 09858718	3.43
5322119	3.42
5415659	3.42
5415872	3.42
AEM 11723244	3.42
ASN 02538846	3.42
MS-100439	3.42
1,2-DIOCTANOYL-SN-GLYCEROL	3.41
ASN 04050311	3.41
T5591540	3.41
ASN 03366994	3.4
ASN 05941222	3.4
5343856	3.39
5664279	3.39
AST 6536068	3.39
ASN 04369984	3.37
ASN 05108137	3.37
T6016736	3.37
T6126657	3.36
5430433	3.35
5683291	3.35
ASN 04051323	3.35
AST 6117479	3.35
AST 6365463	3.35
5182862	3.34
5404251	3.34
5420374	3.34
5467177	3.34
T5671871	3.34
T5778689	3.34
5338876	3.33
5476839	3.33
5747883	3.33
5751096	3.33
ASN 03324628	3.33
T5637643	3.33
T6088917	3.33
5569297	3.32
ASN 03019204	3.32
ASN 03273424	3.32
ASN 04023716	3.32
ASN 04427579	3.32
ASN 04883645	3.32
SYN 15643124	3.32
5303845	3.31
ASN 05919141	3.31
AST 07103644	3.31
AST 6016962	3.31
AST 6118572	3.3
AST 7441623	3.3
T5630739	3.3
T6133331	3.3
5671535	3.29
ASN 02993832	3.29
T5943243	3.29
5320064	3.28
5546816	3.28
5728037	3.28
ASN 04456304	3.28
ASN 05044592	3.28
AST 6118218	3.28
5417644	3.27
AST 4886585	3.27
T5839805	3.27
5121095	3.26
5270065	3.26
5612959	3.26
5621400	3.26
5683959	3.26
5692052	3.26
5789193	3.26
5935510	3.26
ASN 04427090	3.26
ASN 05378975	3.26
ASN 08737568	3.26
T5636187	3.26
T5699472	3.26
ASN 05384145	3.25
ASN 05543828	3.25
AST 6360854	3.25
ASN 08250125	3.24
5117186	3.23
5454176	3.23
5527462	3.23
ASN 02618191	3.23
ASN 03109537	3.23
5338456	3.22
5476304	3.22
5647059	3.22
6330969	3.22
AST 07273479	3.22
AST 6481719	3.22
MS-100749	3.22
T5635557	3.22
T6029544	3.22
T6154182	3.22
5106391	3.21
5270698	3.21
5361489	3.21
5562740	3.21
ASN 03775656	3.21
ASN 05543429	3.21
AST 6146783	3.21
T6149648	3.21
5302550	3.2
5304139	3.2
5781622	3.2
ASN 05589910	3.2
AST 5554523	3.2
AST 6016346	3.2
T5802686	3.2
T5882221	3.2
T6095101	3.2
5416008	3.19
5607788	3.19
ASN 08735040	3.19
MS-100605	3.19
MS-1501113	3.19
5424919	3.18
AEM 12437353	3.18
ASN 07880561	3.18
T6142937	3.18
5431161	3.17
ASN 03430786	3.17
ASN 03580219	3.17
ASN 03983728	3.17
ASN 04192789	3.17
ASN 06118490	3.17
AST 06139592	3.17
AST 5079264	3.17
Moxonidine	3.17
SYN 10820119	3.17
5884947	3.16
5255573	3.15
5282556	3.15
5318411	3.15
ASN 03273327	3.15
ASN 05588362	3.15
ASN 06919675	3.15
AST 4755834	3.15
T5658992	3.15
T5970504	3.15
5685907	3.14
ASN 03156513	3.14
ASN 05545075	3.14
AST 6539840	3.14
5418600	3.13
ASN 03918009	3.13
ASN 05804209	3.13
AST 5937353	3.13
AST 6896049	3.13
T5670289	3.13
T5691490	3.13
T5757694	3.13
T6028735	3.13
5113898	3.12
5113961	3.12
ASN 06569548	3.12
ASN 07082781	3.12
AST 5588978	3.12
MS-300538	3.12
T5950497	3.12
T5951303	3.12
5482320	3.11
ASN 04257431	3.11
ASN 04460216	3.11
ASN 05305219	3.11
AST 6018126	3.11
5326242	3.1
5329885	3.1
5426132	3.1
5635139	3.1
5706072	3.1
ASN 05807440	3.1
T5789010	3.1
T5968368	3.1
5248195	3.09
5718848	3.09
5837620	3.09
6616861	3.09
MS-100682	3.09
T5634983	3.09
T6056185	3.09
5255028	3.08
5404600	3.08
5571052	3.08
Antipyrine, 4-hydroxy	3.08
ASN 04392499	3.08
ASN 05544312	3.08
ASN 05988824	3.08
AST 6579279	3.08
5628681	3.07
5935594	3.07
ASN 04195342	3.07
ASN 06578854	3.07
ASN 07110160	3.07
MS-1500898	3.07
T5661443	3.07
T5762700	3.07
T6079857	3.07
5728100	3.06
ASN 03819273	3.06
AST 06571350	3.06
AST 6536857	3.06
T5781398	3.06
T5868946	3.06
T6142872	3.06
T6144627	3.06
5191705	3.05
5317226	3.05
5493194	3.05
6463205	3.05
6624526	3.05
ASN 04190096	3.05
ASN 04367069	3.05
ASN 05112890	3.05
ASN 08735178	3.05
AST 3777087	3.05
T5742855	3.05
T6115157	3.05
5266596	3.04
5266941	3.04
ASN 03436765	3.04
D-PHENYLALANINE	3.04
5174308	3.03
5209021	3.03
ASN 04371474	3.03
AST 05674338	3.03
T5941100	3.03
T6086739	3.03
5217029	3.02
ASN 05387888	3.02
ASN 06483010	3.02
T5988791	3.02
T6095271	3.02
5469888	3.01
5471607	3.01
5472615	3.01
5524595	3.01
5532070	3.01
5576020	3.01
ASN 04192035	3.01
ASN 04456267	3.01
ASN 05299386	3.01
5130502	3
5131367	3
5302776	3
ASN 05588668	3
T5699823	3
T6124660	3
5526220	2.99
5527345	2.99
ASN 05915466	2.99
ASN 08737570	2.99
MS-1501151	2.99
5664725	2.98
AST 5588877	2.98
5193669	2.97
5240556	2.97
5255148	2.97
5333177	2.97
5354856	2.97
5648039	2.97
5674292	2.97
5930487	2.97
5933465	2.97
6509540	2.97
ASN 01920046	2.97
ASN 02170708	2.97
AST 6019332	2.97
T5646660	2.97
T6147999	2.97
5146675	2.96
5572120	2.96
ASN 03272599	2.96
T5871897	2.96
T6069432	2.96
5174697	2.95
5577788	2.95
5663877	2.95
ASN 03367439	2.95
ASN 04371480	2.95
SYN 17143433	2.95
T5982027	2.95
5541939	2.94
ASN 01842886	2.94
ASN 02170675	2.94
ASN 06954102	2.94
5173660	2.93
5481062	2.93
5789837	2.93
AEM 11116152	2.93
ASN 05936842	2.93
ASN 06752432	2.93
AST 5372550	2.93
MS-100588	2.93
SDZ-202791 S(+)	2.93
T5874962	2.93
SAM001246965	2.92	0.399
5118127	2.92
5628396	2.92
5646931	2.92
6603168	2.92
ASN 03436527	2.92
ASN 05989534	2.92
T5675958	2.92
T6030168	2.92
T6030192	2.92
5214551	2.91
5311456	2.91
5363466	2.91
5466287	2.91
5467158	2.91
ASN 04042173	2.91
ASN 05100829	2.91
T5841151	2.91
5348440	2.9
5452195	2.9
5458901	2.9
5574780	2.9
5747504	2.9
6520414	2.9
T5824564	2.9
5133514	2.89
5222699	2.89
5666718	2.89
6190728	2.89
ASN 04196807	2.89
AST 6118235	2.89
SYN 15649373	2.89
T5964765	2.89
T6002846	2.89
5104952	2.88
5154670	2.88
5548966	2.88
5784082	2.88
ASN 01919966	2.88
ASN 05111896	2.88
AST 06360244	2.88
AST 5545862	2.88
SYN 10366790	2.88
SYN 10399795	2.88
SYN 15639699	2.88
T5861439	2.88
T5939804	2.88
5185882	2.87
5307922	2.87
5631672	2.87
AEM 12454994	2.87
AST 6264504	2.87
T6050068	2.87
T6056072	2.87
T6088610	2.87
T6093571	2.87
5118789	2.86
5256212	2.86
5618390	2.86
5634152	2.86
5871467	2.86
AEM 12230647	2.86
ASN 02324568	2.86
ASN 05561071	2.86
AST 6978279	2.86
MS-201606	2.86
5253491	2.85
5320376	2.85
5406526	2.85
5626573	2.85
5662128	2.85
5689803	2.85
ASN 03367070	2.85
ASN 03795406	2.85
ASN 04370195	2.85
T5866728	2.85
T6012040	2.85
ANANDAMIDE (20:3,n-6)	2.84	-0.0774
5268028	2.84
5467422	2.84
5540395	2.84
5762391	2.84
5768074	2.84
5768355	2.84
ASN 04395047	2.84
ASN 04884671	2.84
AST 5554327	2.84
AST 6014759	2.84
T5636365	2.84
T5848912	2.84
T6107617	2.84
5456609	2.83
ASN 05944609	2.83
ASN 06068566	2.83
ASN 06396726	2.83
T5648457	2.83
T5660983	2.83
T5718083	2.83
T5877233	2.83
T6145756	2.83
T6155981	2.83
5219645	2.82
5647762	2.82
SAM001246606	2.82
T5768222	2.82
T5788084	2.82
T5816353	2.82
5521408	2.81
5532901	2.81
5547056	2.81
5678384	2.81
5683121	2.81
ASN 03367880	2.81
ASN 03801383	2.81
ASN 05388476	2.81
ASN 06117668	2.81
AST 6538114	2.81
5153291	2.8
5361030	2.8
5364529	2.8
5605613	2.8
5622566	2.8
6564765	2.8
ASN 02170664	2.8
ASN 03272548	2.8
ASN 03272699	2.8
ASN 03321738	2.8
ASN 03368158	2.8
ASN 03580221	2.8
ASN 04191376	2.8
ASN 05089538	2.8
ASN 05108586	2.8
ASN 06913935	2.8
ASN 06915192	2.8
ASN 09646944	2.8
AST 6539991	2.8
AST 6541377	2.8
AST 6953405	2.8
SYN 12435902	2.8
SYN 12896223	2.8
SYN 15524900	2.8
T5835307	2.8
T6006307	2.8
5574555	2.79
5685297	2.79
ASN 04370303	2.79
ASN 04480868	2.79
T5644041	2.79
T5765951	2.79
T5783027	2.79
T5861244	2.79
5143213	2.78
5220030	2.78
5241501	2.78
5305264	2.78
5379555	2.78
5931946	2.78
ASN 03206706	2.78
ASN 04369744	2.78
ASN 05388481	2.78
ASN 05397043	2.78
ASN 05397237	2.78
ASN 06744621	2.78
AST 06571460	2.78
AST 6236555	2.78
AST 6537999	2.78
AST 6545949	2.78
T5678349	2.78
5223172	2.77
5322814	2.77
5695926	2.77
5795893	2.77
ASN 05556685	2.77
ASN 06014207	2.77
ASN 06547660	2.77
ASN 08239892	2.77
AST 07102796	2.77
AST 5920692	2.77
AST 6118215	2.77
AST 6121771	2.77
AST 6896059	2.77
AST 6978896	2.77
Beclomethasone dipropionate	2.77
T5610011	2.77
T5899851	2.77
T6053417	2.77
T6053866	2.77
T6132426	2.77
5267402	2.76
5274216	2.76
5312085	2.76
5338055	2.76
5338611	2.76
5809568	2.76
5872522	2.76
ASN 03793460	2.76
ASN 03877438	2.76
ASN 04191547	2.76
AST 5115001	2.76
AST 5543611	2.76
SYN 18334578	2.76
T6078898	2.76
5959766	2.75
ASN 04192720	2.75
ASN 05551450	2.75
ASN 06259106	2.75
T5621991	2.75
T5625618	2.75
T5717616	2.75
T5744751	2.75
T6028027	2.75
T6028941	2.75
5209010	2.74
5545055	2.74
5727869	2.74
5728125	2.74
5738584	2.74
5764445	2.74
ASN 04052069	2.74
AST 07109645	2.74
AST 6019644	2.74
T5696345	2.74
T5751524	2.74
T5830498	2.74
T5886828	2.74
T6062692	2.74
5210656	2.73
5575331	2.73
5577602	2.73
5687751	2.73
ASN 05112463	2.73
ASN 06533227	2.73
SYN 12896251	2.73
SYN 12896252	2.73
5350637	2.72
5411761	2.72
5452346	2.72
5706476	2.72
ASN 04369938	2.72
ASN 04371466	2.72
ASN 04371600	2.72
ASN 05298379	2.72
ASN 05836121	2.72
ASN 07048986	2.72
AST 5101718	2.72
T5637988	2.72
T5824177	2.72
T6075662	2.72
5249122	2.71
5373712	2.71
5535500	2.71
5629501	2.71
5629521	2.71
AEM 12454935	2.71
ASN 03109373	2.71
ASN 03205062	2.71
ASN 03431532	2.71
ASN 03579973	2.71
ASN 04186890	2.71
ASN 05916487	2.71
AST 3777098	2.71
AST 6117865	2.71
AST 6118233	2.71
AST 6539879	2.71
MS-1505322	2.71
T5630616	2.71
T5797808	2.71
T5807643	2.71
5373656	2.7
5375117	2.7
5470862	2.7
5471508	2.7
6643719	2.7
ASN 05304781	2.7
ASN 05550981	2.7
ASN 05923415	2.7
AST 6745093	2.7
T5703379	2.7
T5815690	2.7
T5870606	2.7
5280480	2.69
5345111	2.69
5467092	2.69
5480551	2.69
5527882	2.69
5561222	2.69
5561911	2.69
5715150	2.69
5716938	2.69
5747030	2.69
5749728	2.69
AST 6536453	2.69
SAM001246796	2.69
SYN 15610420	2.69
SYN 15610713	2.69
T5934470	2.69
T5954665	2.69
5140331	2.68
5157388	2.68
5304327	2.68
ASN 03367824	2.68
ASN 04482017	2.68
ASN 05082962	2.68
ASN 05257184	2.68
AST 5545489	2.68
AST 6977660	2.68
AST 7103044	2.68
T6007607	2.68
T6078473	2.68
T6114306	2.68
5193812	2.67
5242961	2.67
5477591	2.67
5533369	2.67
5548956	2.67
5573003	2.67
ASN 05112392	2.67
T5645599	2.67
T5752807	2.67
T5812168	2.67
T5833518	2.67
T5918271	2.67
T6001588	2.67
5106303	2.66
5256907	2.66
6584870	2.66
6585458	2.66
ASN 02323924	2.66
ASN 02976667	2.66
ASN 03365110	2.66
ASN 03579647	2.66
ASN 05115290	2.66
ASN 05987885	2.66
ASN 09858446	2.66
AST 5822575	2.66
SYN 09842391	2.66
SYN 11263856	2.66
SYN 12969933	2.66
Syrosingopine	2.66
T5719552	2.66
T5723035	2.66
T5897807	2.66
T6065182	2.66
T6154459	2.66
5219975	2.65
5379381	2.65
5380904	2.65
5676066	2.65
ASN 06482374	2.65
ASN 06914642	2.65
AST 07108789	2.65
AST 6117822	2.65
AST 6118605	2.65
AST 6361600	2.65
AST 6570827	2.65
T5637926	2.65
5209020	2.64
5227801	2.64
5761560	2.64
ASN 03108205	2.64
ASN 04454799	2.64
ASN 06448719	2.64
ASN 06547478	2.64
AST 06139569	2.64
AST 6117858	2.64
AST 6532853	2.64
T5981999	2.64
T6059417	2.64
T6060694	2.64
5197025	2.63
5204133	2.63
5467510	2.63
5476064	2.63
5525030	2.63
5739189	2.63
ASN 03430745	2.63
ASN 04192597	2.63
ASN 05381671	2.63
ASN 06563562	2.63
AST 5116503	2.63
AST 5939466	2.63
AST 6015389	2.63
AST 6118228	2.63
AST 6118237	2.63
T5588005	2.63
T5680676	2.63
T5893755	2.63
5115703	2.62
5159190	2.62
5175762	2.62
5351855	2.62
5354425	2.62
5467403	2.62
5540657	2.62
5576530	2.62
ASN 05111894	2.62
AST 05653486	2.62
T6074052	2.62
T6098229	2.62
T6102970	2.62
T6149657	2.62
5215012	2.61
5256529	2.61
5788465	2.61
AEM 10297948	2.61
AEM 10415590	2.61
AEM 12454479	2.61
ASN 03800662	2.61
ASN 05387789	2.61
ASN 05555131	2.61
ASN 06365979	2.61
T6002001	2.61
5373021	2.6
5410865	2.6
5412501	2.6
5471300	2.6
5474584	2.6
5531072	2.6
ASN 03433743	2.6
ASN 05544299	2.6
ASN 05916451	2.6
ASN 06353605	2.6
ASN 06482152	2.6
AST 06533203	2.6
AST 07109648	2.6
AST 3801600	2.6
AST 5588368	2.6
AST 6350261	2.6
AST 6897659	2.6
5118767	2.59
5240372	2.59
5283196	2.59
5357436	2.59
5528375	2.59
5562635	2.59
5655201	2.59
5915234	2.59
5926742	2.59
ASN 04194810	2.59
ASN 05305176	2.59
ASN 07112125	2.59
AST 06571399	2.59
AST 6404570	2.59
AST 6942244	2.59
AST 6977586	2.59
AST 7115462	2.59
AST 7273636	2.59
MS-1500588	2.59
SAM001247108	2.59
SYN 12896231	2.59
T6063902	2.59
T6142095	2.59
T6188470	2.59
5186207	2.58
5192211	2.58
5269908	2.58
5304197	2.58
5356934	2.58
5361038	2.58
5565086	2.58
5758628	2.58
6586759	2.58
ASN 03273369	2.58
ASN 03575083	2.58
ASN 04392512	2.58
ASN 06365696	2.58
AST 6977109	2.58
T5993422	2.58
T6044293	2.58
5156246	2.57
5305466	2.57
5524747	2.57
5618626	2.57
5781447	2.57
5783960	2.57
5784174	2.57
ASN 03366710	2.57
ASN 04369975	2.57
ASN 05114313	2.57
ASN 07085560	2.57
AST 6014227	2.57
AST 6121756	2.57
T5695217	2.57
T5936840	2.57
T6099880	2.57
5144897	2.56
5252633	2.56
5255821	2.56
5311661	2.56
5788787	2.56
5800550	2.56
ASN 02254690	2.56
AST 6014373	2.56
H-7	2.56
Oleoyl GABA	2.56
SYN 15564905	2.56
T5827594	2.56
5340723	2.55
5458486	2.55
5467449	2.55
AEM 10039142	2.55
AEM 11158032	2.55
ASN 02976604	2.55
ASN 04369129	2.55
ASN 04371569	2.55
ASN 04456278	2.55
ASN 05260779	2.55
ASN 05941258	2.55
ASN 06292106	2.55
AST 07276320	2.55
AST 5081216	2.55
MS-1504119	2.55
MS-1504161	2.55
T5598342	2.55
T5678696	2.55
T5705291	2.55
T5727085	2.55
5194039	2.54
5213337	2.54
5217830	2.54
5268317	2.54
5271226	2.54
5277996	2.54
5311649	2.54
5316696	2.54
5488239	2.54
5569108	2.54
5584202	2.54
AEM 11117615	2.54
ASN 03578916	2.54
ASN 05104847	2.54
ASN 05552598	2.54
ASN 05809380	2.54
ASN 06153237	2.54
ASN 06546853	2.54
AST 6118232	2.54
H-89	2.54
T5853922	2.54
T5981526	2.54
5172595	2.53
5174687	2.53
5186152	2.53
5258662	2.53
5339302	2.53
5343977	2.53
5346295	2.53
5423046	2.53
5557994	2.53
5823090	2.53
6203724	2.53
ASN 02170678	2.53
ASN 02538730	2.53
ASN 03272711	2.53
ASN 03436705	2.53
MS-1505340	2.53
T5983655	2.53
MS-2300104	2.52	0.995	0.0894
5138785	2.52
5255397	2.52
5431126	2.52
5478151	2.52
5561898	2.52
AEM 12503090	2.52
ASN 03367904	2.52
ASN 06235059	2.52
ASN 07110335	2.52
AST 6121900	2.52
AST 6126741	2.52
AST 6352423	2.52
AST 6895800	2.52
AST 6978458	2.52
MS-202175	2.52
SAM001246870	2.52
SYN 12467384	2.52
SYN 15599611	2.52
T5708444	2.52
T5744817	2.52
T5902035	2.52
T6029691	2.52
T6114467	2.52
5458876	2.51
5469659	2.51
5526212	2.51
5576082	2.51
5650777	2.51
5730590	2.51
5734088	2.51
ASN 01269246	2.51
ASN 02977090	2.51
ASN 04419982	2.51
ASN 05101122	2.51
ASN 06482980	2.51
ASN 07186704	2.51
ASN 09858717	2.51
AST 07108511	2.51
AST 6018504	2.51
AST 6538073	2.51
MS-1502245	2.51
SYN 15666992	2.51
T5602786	2.51
T5807605	2.51
T5878461	2.51
T6024595	2.51
T6082351	2.51
T6100432	2.51
Disulfiram	2.5	-0.506	-0.695	0.218
5101970	2.5
5113915	2.5
5256360	2.5
5262447	2.5
5264695	2.5
5473925	2.5
5788885	2.5
ASN 03580148	2.5
ASN 04190803	2.5
ASN 06014815	2.5
AST 07108526	2.5
AST 3777147	2.5
AST 5445126	2.5
AST 6118580	2.5
AST 6977847	2.5
AST 6978082	2.5
AST 7087699	2.5
AST 7101625	2.5
MS-100205	2.5
MS-1500112	2.5
T5591878	2.5
T5997516	2.5
Verapamyl hydrochloride	2.5
5113007	2.49
5118426	2.49
5158512	2.49
5330336	2.49
5416983	2.49
5542754	2.49
5706770	2.49
5708963	2.49
5919822	2.49
5921838	2.49
6572098	2.49
6609456	2.49
ASN 02254854	2.49
ASN 06918741	2.49
ASN 09586442	2.49
ASN 09858173	2.49
Digoxigenin	2.49
T5600581	2.49
T5902004	2.49
T5929654	2.49
T5966198	2.49
T6014517	2.49
T6130456	2.49
T6133889	2.49
5193023	2.48
5244587	2.48
5244673	2.48
5458609	2.48
5568721	2.48
ASN 04192819	2.48
ASN 04459267	2.48
ASN 05303774	2.48
ASN 08731158	2.48
T5821888	2.48
T5824594	2.48
T5847322	2.48
5304258	2.47
5306027	2.47
5306032	2.47
5489886	2.47
5523566	2.47
5546982	2.47
5781624	2.47
5782706	2.47
AEM 10042394	2.47
AEM 12436523	2.47
ASN 03368138	2.47
ASN 05112498	2.47
ASN 05114979	2.47
ASN 05545673	2.47
ASN 05990643	2.47
ASN 06117081	2.47
SKF-96365	2.47
SYN 15654364	2.47
T5608504	2.47
T5611234	2.47
T5870264	2.47
T6071184	2.47
T6145674	2.47
5135539	2.46
5139370	2.46
5256868	2.46
5311238	2.46
5355480	2.46
5629294	2.46
6625790	2.46
6638790	2.46
6657504	2.46
ASN 05588317	2.46
AST 07274628	2.46
AST 6540291	2.46
AST 6591246	2.46
AST 7275519	2.46
T5635137	2.46
T5837165	2.46
T5992212	2.46
T6076958	2.46
5228994	2.45
5233030	2.45
5237495	2.45
5422054	2.45
5423262	2.45
5478833	2.45
5575950	2.45
5577850	2.45
5650946	2.45
5670951	2.45
5796173	2.45
5844384	2.45
5856209	2.45
5875964	2.45
ASN 05448472	2.45
ASN 05546159	2.45
ASN 08896088	2.45
AST 05945439	2.45
AST 7274859	2.45
SYN 15584348	2.45
T5808549	2.45
T5853630	2.45
T6151575	2.45
5103096	2.44
5106574	2.44
5110215	2.44
5227864	2.44
5340393	2.44
5493201	2.44
ASN 03200402	2.44
ASN 04194805	2.44
ASN 05114176	2.44
ASN 05304919	2.44
AST 6345786	2.44
MS-1500576	2.44
MS-1503990	2.44
T5601695	2.44
T5664863	2.44
T5977500	2.44
T6058159	2.44
T6059984	2.44
T6125502	2.44
T6128220	2.44
T6128642	2.44
T6131568	2.44
T6132359	2.44
5260448	2.43
5275737	2.43
5280744	2.43
5323571	2.43
5401249	2.43
5770688	2.43
AEM 10788815	2.43
AEM 11104635	2.43
ASN 04427556	2.43
ASN 6019567	2.43
AST 07104407	2.43
MS-100035	2.43
T5637907	2.43
T5767696	2.43
T5862235	2.43
5156315	2.42
5160947	2.42
5163010	2.42
5326508	2.42
5326552	2.42
5329528	2.42
5350975	2.42
5571310	2.42
AEM 12436378	2.42
ASN 04886974	2.42
ASN 05675840	2.42
ASN 05943940	2.42
ASN 06126924	2.42
ASN 06402460	2.42
ASN 06744477	2.42
AST 07108566	2.42
AST 6898750	2.42
T5635940	2.42
T5800203	2.42
T5856296	2.42
MS-1504302	2.41	1.61
SAM001247023	2.41	1.29
Trazodone hydrochloride	2.41	-0.103	3.78	0.469
5221138	2.41
5249951	2.41
5251333	2.41
5318015	2.41
5319059	2.41
5457333	2.41
5727547	2.41
5732552	2.41
6505899	2.41
ASN 03951292	2.41
ASN 05584786	2.41
ASN 06588045	2.41
Mefloquine hydrochloride	2.41
T5616480	2.41
T5687909	2.41
T5692737	2.41
T5894948	2.41
T6110270	2.41
5379383	2.4
5392972	2.4
5431316	2.4
5535604	2.4
5552375	2.4
5552540	2.4
5561362	2.4
5610871	2.4
AEM 10400494	2.4
AEM 10820161	2.4
AEM 12439434	2.4
AEM 12454939	2.4
AEM 12502738	2.4
ASN 03888910	2.4
ASN 04458771	2.4
ASN 05114875	2.4
ASN 05304626	2.4
ASN 05440773	2.4
AST 6236625	2.4
AST 6866144	2.4
T5592373	2.4
T5635463	2.4
T5636169	2.4
T5939356	2.4
T5941305	2.4
T5987291	2.4
T5992831	2.4
T6068890	2.4
T6121924	2.4
5119746	2.39
5141877	2.39
5258339	2.39
5302993	2.39
5329386	2.39
5646505	2.39
5705462	2.39
5709199	2.39
5716758	2.39
5789523	2.39
AEM 10366960	2.39
AEM 11114609	2.39
ASN 03991630	2.39
ASN 04455139	2.39
ASN 05945372	2.39
ASN 06365323	2.39
AST 7153649	2.39
T5629648	2.39
T5717253	2.39
T5750428	2.39
T6002034	2.39
T6002318	2.39
T6079479	2.39
T6089253	2.39
T6131405	2.39
T6146961	2.39
5417229	2.38
5431808	2.38
5967558	2.38
ASN 02834190	2.38
ASN 03877913	2.38
ASN 04369384	2.38
ASN 05255237	2.38
ASN 05669723	2.38
ASN 05673438	2.38
ASN 05812732	2.38
ASN 06351455	2.38
ASN 06748933	2.38
ASN 08737853	2.38
ASN 08737944	2.38
AST 5588192	2.38
AST 6463988	2.38
MS-1502053	2.38
SYN 11118697	2.38
SYN 11264261	2.38
T5823703	2.38
T5858465	2.38
T5952960	2.38
T5960897	2.38
T5987028	2.38
T6154520	2.38
5110006	2.37
5113172	2.37
5240797	2.37
5387114	2.37
5404487	2.37
5404527	2.37
5406298	2.37
5411654	2.37
5424324	2.37
ASN 03272524	2.37
ASN 03272904	2.37
ASN 03799454	2.37
ASN 04042176	2.37
ASN 05254207	2.37
ASN 05544939	2.37
ASN 05988731	2.37
Dihydroergotoxine mesylate	2.37
T5834069	2.37
T5918067	2.37
T6088360	2.37
5213395	2.36
5213850	2.36
5254860	2.36
5305171	2.36
5310288	2.36
5538551	2.36
5656363	2.36
5657240	2.36
5752688	2.36
5781689	2.36
5782499	2.36
6370711	2.36
6449876	2.36
6626956	2.36
ASN 03797737	2.36
ASN 04186389	2.36
ASN 04191537	2.36
ASN 04195076	2.36
ASN 04427021	2.36
ASN 05380064	2.36
Eicosa-11Z,14Z-dienoyl ethanolamide	2.36
MS-1500246	2.36
SYN 10377148	2.36
SYN 11114367	2.36
SYN 15572222	2.36
SYN 15601126	2.36
SYN 15714178	2.36
SYN 15788603	2.36
T5730613	2.36
T5734399	2.36
T6116240	2.36
5234543	2.35
5236858	2.35
5241106	2.35
5242835	2.35
5565057	2.35
5695969	2.35
5705421	2.35
5869823	2.35
ASN 03367502	2.35
ASN 05104575	2.35
ASN 05108328	2.35
ASN 05109567	2.35
ASN 05293939	2.35
ASN 06235884	2.35
ASN 06254767	2.35
ASN 06744500	2.35
ASN 07104484	2.35
ASN 07185177	2.35
ASN 07200821	2.35
ASN 08731175	2.35
AST 06351324	2.35
AST 5544580	2.35
AST 5557460	2.35
AST 5588279	2.35
AST 5939970	2.35
AST 6121871	2.35
AST 6552783	2.35
MS-1502208	2.35
SYN 15663802	2.35
T5608730	2.35
T5710062	2.35
T5933117	2.35
T5988489	2.35
T6068928	2.35
T6106152	2.35
T6122080	2.35
5123490	2.34
5145553	2.34
5161577	2.34
5194820	2.34
5209146	2.34
5322150	2.34
5323420	2.34
5332281	2.34
5339300	2.34
5341996	2.34
5345482	2.34
5345685	2.34
5351609	2.34
5475030	2.34
5476650	2.34
5531251	2.34
5531791	2.34
5555107	2.34
5562773	2.34
5592050	2.34
5604662	2.34
5606979	2.34
5661558	2.34
5662210	2.34
6563934	2.34
AEM 12502903	2.34
ASN 02790574	2.34
ASN 03367821	2.34
ASN 03851194	2.34
ASN 04454800	2.34
AST 5939997	2.34
Clobetasol propionate	2.34
T5862636	2.34
T5949517	2.34
Econazole nitrate	2.33	2.28
Perphenazine	2.33	0.178
5452130	2.33
5526298	2.33
AEM 10039078	2.33
AEM 11207625	2.33
AEM 12502536	2.33
ASN 03016860	2.33
ASN 05387295	2.33
ASN 05546086	2.33
AST 07108556	2.33
AST 07108826	2.33
AST 6291617	2.33
AST 6540625	2.33
SYN 15724251	2.33
SYN 17360500	2.33
T5632147	2.33
T5634217	2.33
T5684039	2.33
T5690369	2.33
T5691060	2.33
T5902329	2.33
T6036277	2.33
T6050542	2.33
T6075293	2.33
T6075347	2.33
5119355	2.32
5139344	2.32
5159226	2.32
5267323	2.32
5274795	2.32
5509492	2.32
ASN 03069786	2.32
ASN 04192512	2.32
ASN 04364312	2.32
ASN 04392558	2.32
ASN 05256461	2.32
ASN 05299856	2.32
ASN 05346252	2.32
ASN 05943735	2.32
ASN 06579629	2.32
AST 5941873	2.32
AST 6156116	2.32
AST 6361589	2.32
T5693829	2.32
T5795610	2.32
T6155024	2.32
5215573	2.31
5420369	2.31
5623948	2.31
5628345	2.31
5816649	2.31
ASN 02138197	2.31
ASN 03791475	2.31
ASN 04037146	2.31
ASN 04195230	2.31
ASN 05304741	2.31
ASN 05377179	2.31
ASN 05988179	2.31
ASN 06978288	2.31
AST 5545216	2.31
SAM001246575	2.31
T5595154	2.31
T5677184	2.31
T5777346	2.31
T5845677	2.31
T5852142	2.31
5103827	2.3
5302066	2.3
5303762	2.3
5338348	2.3
5473158	2.3
5538182	2.3
5540120	2.3
5566099	2.3
5567149	2.3
5648660	2.3
ASN 03801443	2.3
ASN 04049811	2.3
ASN 04369981	2.3
ASN 04481604	2.3
ASN 05113065	2.3
AST 4888754	2.3
AST 5545373	2.3
AST 6016978	2.3
AST 6019326	2.3
AST 6235544	2.3
MS-1500778	2.3
MS-1800009	2.3
MS-330081	2.3
T5579456	2.3
T5836697	2.3
T5940985	2.3
T5980257	2.3
T6081166	2.3
T6103755	2.3
T6111824	2.3
T6113024	2.3
5226756	2.29
5321529	2.29
5328781	2.29
5344217	2.29
5356940	2.29
5425258	2.29
5659472	2.29
5667961	2.29
5671699	2.29
5744190	2.29
5746296	2.29
ASN 04190967	2.29
ASN 05386864	2.29
ASN 05588013	2.29
ASN 05671804	2.29
SYN 14731866	2.29
T5610019	2.29
T5638309	2.29
T5876497	2.29
T5877477	2.29
T5877733	2.29
T6060301	2.29
T6063477	2.29
5151249	2.28
5238219	2.28
5258596	2.28
5262233	2.28
5278808	2.28
5555321	2.28
5604036	2.28
5609957	2.28
5617573	2.28
6337906	2.28
AEM 10367541	2.28
ASN 02538145	2.28
ASN 03366390	2.28
ASN 03579810	2.28
ASN 04186383	2.28
ASN 04371097	2.28
ASN 05102679	2.28
ASN 05553608	2.28
ASN 05675250	2.28
ASN 06477094	2.28
AST 06138627	2.28
AST 4358997	2.28
AST 5671656	2.28
AST 5814040	2.28
AST 6402373	2.28
AST 7153639	2.28
SYN 15659488	2.28
SYN 15788601	2.28
SYN 16385752	2.28
SYN 17922508	2.28
SYN 17927767	2.28
T5818477	2.28
T5851612	2.28
T5997292	2.28
T6000585	2.28
T6006236	2.28
T6030705	2.28
T6126670	2.28
5211920	2.27
5257115	2.27
5269338	2.27
5275907	2.27
5373255	2.27
5373919	2.27
5380256	2.27
5526179	2.27
5528217	2.27
5548135	2.27
5681217	2.27
ASN 03431481	2.27
ASN 03579870	2.27
ASN 03792243	2.27
ASN 05212027	2.27
ASN 06399085	2.27
ASN 09859173	2.27
AST 5923671	2.27
AST 6976841	2.27
C8 CERAMINE	2.27
T5583294	2.27
T5919890	2.27
T5968897	2.27
T5969493	2.27
T6149579	2.27
5244597	2.26
5307628	2.26
5313389	2.26
5747231	2.26
5749671	2.26
5782760	2.26
ASN 04417559	2.26
ASN 05019106	2.26
ASN 05257106	2.26
ASN 05305180	2.26
ASN 06291163	2.26
AST 5554104	2.26
AST 6078677	2.26
AST 6136802	2.26
MS-1505327	2.26
MS-1505330	2.26
T5629389	2.26
Tribenoside	2.26
Oxethazaine	2.25	1.48
5142630	2.25
5146191	2.25
5194467	2.25
5194703	2.25
5202158	2.25
5347486	2.25
5348566	2.25
5364493	2.25
5366538	2.25
5386448	2.25
5403755	2.25
5406158	2.25
5647801	2.25
5651249	2.25
5843895	2.25
AEM 10038853	2.25
ASN 04050648	2.25
ASN 04370341	2.25
ASN 05018018	2.25
ASN 05075720	2.25
ASN 05076051	2.25
ASN 05076054	2.25
ASN 05346161	2.25
ASN 05936523	2.25
ASN 07161260	2.25
AST 5651468	2.25
AST 6977865	2.25
SYN 15636474	2.25
T5600537	2.25
T5645560	2.25
T5846508	2.25
T5902080	2.25
T5907296	2.25
T5946404	2.25
T6067945	2.25
T6134205	2.25
WORTMANNIN	2.25
5109364	2.24
5118177	2.24
5220248	2.24
5234686	2.24
5242836	2.24
5263703	2.24
5266735	2.24
5417760	2.24
5422010	2.24
5431900	2.24
5569741	2.24
5649529	2.24
5653974	2.24
5659149	2.24
5705347	2.24
AEM 12407226	2.24
AEM 12408329	2.24
AEM 12450595	2.24
ASN 03431337	2.24
ASN 04210841	2.24
ASN 04369834	2.24
ASN 04450505	2.24
ASN 05552669	2.24
ASN 05936252	2.24
ASN 05945798	2.24
ASN 05987756	2.24
ASN 06483969	2.24
ASN 06919484	2.24
ASN 08735653	2.24
AST 07108567	2.24
AST 6384488	2.24
SYN 15585257	2.24
T5713074	2.24
T5715010	2.24
T5715209	2.24
T5718449	2.24
T5886991	2.24
T6099562	2.24
T6104792	2.24
5128560	2.23
5181622	2.23
5186762	2.23
5319190	2.23
5325977	2.23
5340235	2.23
5564130	2.23
5660415	2.23
5672379	2.23
6616617	2.23
ASN 03576855	2.23
ASN 03652813	2.23
ASN 03798144	2.23
ASN 04189193	2.23
ASN 05384219	2.23
AST 6019620	2.23
AST 6360770	2.23
AST 6978086	2.23
AST 6978467	2.23
AST 7274399	2.23
MS-100201	2.23
T5611536	2.23
T5614781	2.23
T5616798	2.23
T5677497	2.23
T5707060	2.23
T5978518	2.23
T5988029	2.23
T6053698	2.23
T6144615	2.23
T6146209	2.23
5104692	2.22
5105378	2.22
5350231	2.22
5394414	2.22
5540598	2.22
5558128	2.22
5574565	2.22
ASN 01906620	2.22
ASN 02137481	2.22
ASN 03221958	2.22
ASN 03430740	2.22
ASN 03777879	2.22
ASN 04370701	2.22
ASN 04481599	2.22
ASN 05102508	2.22
ASN 05109552	2.22
ASN 05114983	2.22
ASN 06356237	2.22
ASN 06745122	2.22
ASN 09646990	2.22
AST 5551522	2.22
AST 6578262	2.22
MS-1500338	2.22
T5755429	2.22
T5816551	2.22
T5918649	2.22
T6004775	2.22
T6013887	2.22
SAM001246716	2.21	1.09
5157891	2.21
5210711	2.21
5213649	2.21
5230391	2.21
5251157	2.21
5277546	2.21
5353883	2.21
5527461	2.21
5628013	2.21
5634386	2.21
6623658	2.21
ASN 02749017	2.21
ASN 03204240	2.21
ASN 03221685	2.21
ASN 04363280	2.21
ASN 04457454	2.21
ASN 05659750	2.21
ASN 06222565	2.21
ASN 06291761	2.21
ASN 06396722	2.21
ASN 08245362	2.21
AST 06146735	2.21
AST 6153109	2.21
AST 6537614	2.21
AST 6540594	2.21
MS-1505269	2.21
SAM001246577	2.21
SAM001246718	2.21
SYN 15634078	2.21
SYN 15654231	2.21
SYN 15659631	2.21
SYN 15667838	2.21
SYN 15710557	2.21
SYN 15713377	2.21
T5671741	2.21
T5840569	2.21
T5942018	2.21
T6146894	2.21
5281989	2.2
5432178	2.2
5453541	2.2
5473324	2.2
5473731	2.2
5493503	2.2
5521684	2.2
5522469	2.2
5544936	2.2
5547136	2.2
5813372	2.2
5931138	2.2
6324174	2.2
6369759	2.2
ASN 01906683	2.2
ASN 02323990	2.2
ASN 04369489	2.2
ASN 09858900	2.2
AST 06139605	2.2
MS-1502253	2.2
MS-1505234	2.2
SU1498	2.2
SYN 15701636	2.2
T5580348	2.2
T5624777	2.2
T5624835	2.2
T5647101	2.2
T5651048	2.2
T5660674	2.2
T5661610	2.2
T5858500	2.2
T6114219	2.2
T6137037	2.2
5338325	2.19
5344748	2.19
5352994	2.19
5710462	2.19
5713841	2.19
5727029	2.19
5728105	2.19
5733117	2.19
6554698	2.19
AEM 12437337	2.19
AEM 12454262	2.19
ASN 04369966	2.19
ASN 05293940	2.19
ASN 05388482	2.19
ASN 05441212	2.19
ASN 05561439	2.19
AST 5545381	2.19
AST 5545758	2.19
AST 5804854	2.19
AST 5989036	2.19
AST 6015620	2.19
AST 6218124	2.19
AST 6540638	2.19
AST 6866088	2.19
T5645860	2.19
T5790373	2.19
T5816102	2.19
T5831034	2.19
T5851339	2.19
T5869128	2.19
T5905901	2.19
T6028039	2.19
T6028596	2.19
T6032294	2.19
T6139795	2.19
5193167	2.18
5193631	2.18
5213352	2.18
5245399	2.18
5255039	2.18
5255491	2.18
5303009	2.18
5420284	2.18
5420969	2.18
5467298	2.18
5566748	2.18
5566965	2.18
5603486	2.18
5625917	2.18
5680454	2.18
AEM 10039332	2.18
AEM 10835233	2.18
ASN 01906772	2.18
ASN 03273099	2.18
ASN 03273408	2.18
ASN 05584572	2.18
ASN 06576054	2.18
ASN 06577852	2.18
ASN 06578038	2.18
ASN 07184382	2.18
ASN 08232784	2.18
AST 5588016	2.18
AST 5942688	2.18
AST 5944217	2.18
AST 5988396	2.18
AST 6533200	2.18
AST 6744007	2.18
SYN 17736484	2.18
T5765034	2.18
T5945268	2.18
T6002335	2.18
5219983	2.17
5258512	2.17
5264815	2.17
5317380	2.17
5318493	2.17
5320380	2.17
5376770	2.17
5540568	2.17
5542670	2.17
5564819	2.17
5613573	2.17
5617912	2.17
[truncated: 63,536 more rows]
[truncated: 1 more columns]
