# Supplementary material for: Small Molecule Screening with Laser Cytometry Can Be Used to Identify Pro-Survival Molecules in Human Embryonic Stem Cells
Source: PLoS One. 2013 Jan 29;8(1):e54948. doi: 10.1371/journal.pone.0054948 (PMC3558484; doi:10.1371/journal.pone.0054948)
Supplement: Table S5 — Normalized Z score results of rescreening in perimeter filtered screen. (XLS) [file pone.0054948.s005.xls]

## Sheet: Sheet1
Supplementary Table 5: Results of rescreening in perimeter filtered screen.
Compound name	Z-score from primary assay	Z-score in repeat assay
HA-1077	5.29	4.62759
T5597864	9.06	2.93942
T5861368	4.28	2.93942
AEM 10367476	7.41	2.8159
T5974844	3.67	2.28063
MS-1500274	6.88	2.1571
T6014652	4.03	2.11593
5348017	5.86	1.86888
T5998472	4.2	1.78653
T5811122	3.77	1.21008
ASN 05299587	3.55	1.16891
ASN 06917037	4.39	1.08656
5539968	4.28	1.04538
T6070005	3.67	0.880683
5425974	3.59	0.715984
ASN 05915774	4.06	0.674809
T6108659	3.64	0.674809
ASN 04187316	4.86	0.633634
T6062916	4.08	0.633634
AST 6866213	3.82	0.51011
MS-100162	4.08	0.51011
ASN 05988001	3.62	0.386585
T6103934	3.98	0.386585
5270030	3.95	0.345411
Pinacidil	4.59	0.345411
AST 5944128	3.62	0.304236
ASN 05932166	4.09	0.263061
T5904780	3.74	0.263061
5466982	4.14	0.180712
6534490	3.61	0.139537
5681370	5.4	0.098362
5670766	3.71	0.0571872
T6147840	3.97	0.0571872
6651022	3.72	0.0160124
ASN 05987984	4.03	0.0160124
ASN 04392945	4.09	-0.0251624
5657508	4.26	-0.0663371
6624529	3.66	-0.107512
T5840433	3.69	-0.148687
T5942234	5.11	-0.189861
5406446	3.72	-0.354561
6046765	3.63	-0.43691
5538529	3.65	-0.478085
T5735431	3.9	-0.642784
5650569	4.11	-0.725134
AST 6535797	4.34	-0.807483
T5973973	4.69	-1.13688
ASN 05682285	3.64	-1.34276
T5950244	3.93	-1.38393
ASN 04888773	3.58	-1.50745
